# Supplementary material for: The Complete Genome Sequence and Analysis of the Epsilonproteobacterium Arcobacter butzleri
Source: PLOS journal article supplement (doi:10.1371/journal.pone.0001358), 2007-12-26
Supplement: S8 (10.1371/journal.pone.0001358.s008) [file journal.pone.0001358.s008]

**Table S6. CDS contained in all *A. butzleri* strains examined**

| <b><u>Gene Name</u></b> | <b><u>Common</u></b> | <b><u>Description</u></b>                                                         |
|-------------------------|----------------------|-----------------------------------------------------------------------------------|
| AB0001                  | <i>dnaA</i>          | Chromosomal replication initiator protein DnaA                                    |
| AB0002                  | <i>dnaN</i>          | DNA polymerase III, beta subunit                                                  |
| AB0003                  | <i>gyrB</i>          | DNA gyrase, subunit B                                                             |
| AB0004                  |                      | Probable thioredoxin reductase                                                    |
| AB0005                  | <i>queF</i>          | 7-cyano-7-deazaguanine reductase                                                  |
| AB0006                  |                      | Hypothetical protein                                                              |
| AB0007                  |                      | Conserved hypothetical protein, putative integral membrane protein                |
| AB0008                  |                      | Conserved hypothetical protein, possible methyltransferase                        |
| AB0009                  | <i>modD</i>          | Molybdenum ABC transporter, ATP-binding protein                                   |
| AB0010                  | <i>modB</i>          | Molybdenum ABC transporter, permease protein                                      |
| AB0011                  |                      | Conserved hypothetical protein                                                    |
| AB0012                  | <i>modA</i>          | Molybdenum ABC transporter, periplasmic molybdate-binding protein                 |
| AB0013                  | <i>modE</i>          | Molybdenum-binding protein, N-terminal:molybdenum-pterin binding domain           |
| AB0014                  |                      | Conserved hypothetical membrane protein                                           |
| AB0015                  |                      | Transcriptional regulator, LysR family                                            |
| AB0016                  |                      | Conserved hypothetical protein, putative MFS permease                             |
| AB0018                  |                      | Ribosomal large subunit pseudouridine synthase                                    |
| AB0019                  | <i>purB</i>          | Adenylosuccinate lyase                                                            |
| AB0020                  | <i>nrdA</i>          | Ribonucleoside-diphosphate reductase, alpha chain                                 |
| AB0021                  | <i>nrdB</i>          | Ribonucleoside-diphosphate reductase, beta chain                                  |
| AB0023                  |                      | Conserved hypothetical protein                                                    |
| AB0025                  |                      | Hypothetical protein, OmpA domain                                                 |
| AB0026                  |                      | Conserved hypothetical protein                                                    |
| AB0027                  |                      | Zinc-containing alcohol dehydrogenase superfamily protein                         |
| AB0028                  |                      | Conserved hypothetical protein (DUF24 domain protein)                             |
| AB0029                  | <i>gpsA</i>          | Glycerol 3-phosphate dehydrogenase                                                |
| AB0030                  | <i>gatB</i>          | Glutamyl-tRNA(Gln) amidotransferase, subunit B                                    |
| AB0031                  |                      | Conserved hypothetical protein                                                    |
| AB0032                  |                      | Oxidoreductase, FAD-binding/iron-sulfur cluster-binding protein                   |
| AB0033                  | <i>lctP</i>          | L-lactate permease                                                                |
| AB0034                  |                      | Two-component response regulator                                                  |
| AB0035                  |                      | Two-component sensor histidine kinase                                             |
| AB0036                  |                      | Conserved hypothetical protein (DUF162 domain protein)                            |
| AB0037                  |                      | Iron-sulfur cluster binding protein, putative                                     |
| AB0038                  |                      | Fe-S oxidoreductase                                                               |
| AB0039                  |                      | dCMP deaminase, putative                                                          |
| AB0040                  | <i>accB</i>          | Acetyl-CoA carboxylase, biotin carboxyl carrier protein                           |
| AB0041                  | <i>accC1</i>         | Acetyl CoA carboxylase, biotin carboxylase subunit                                |
| AB0042                  |                      | ATP-dependent RNA helicase, DEAD box family                                       |
| AB0044                  |                      | Phosphate permease, putative                                                      |
| AB0045                  |                      | Conserved hypothetical protein, putative permease                                 |
| AB0047                  |                      | Hypothetical protein                                                              |
| AB0048                  |                      | PhoH family protein                                                               |
| AB0049                  |                      | Conserved hypothetical integral membrane protein                                  |
| AB0050                  |                      | ATPase, AAA family protein                                                        |
| AB0051                  | <i>rluB</i>          | Ribosomal large subunit pseudouridine synthase B                                  |
| AB0052                  |                      | Carbohydrate isomerase, KpsF/GutQ family                                          |
| AB0053                  |                      | Conserved hypothetical protein, predicted hydrolase of the metallo-beta-lactamase |
| AB0054                  | <i>ksgA</i>          | Dimethyladenosine transferase                                                     |
| AB0055                  | <i>hisF1</i>         | Imidazoleglycerol phosphate synthase, cyclase subunit                             |
| AB0056                  |                      | Conserved hypothetical protein                                                    |
| AB0057                  |                      | Conserved hypothetical protein, possible purine nucleoside phosphorylase          |

|        |              |                                                                            |
|--------|--------------|----------------------------------------------------------------------------|
| AB0058 |              | Conserved hypothetical protein, radical SAM enzyme, Cfr family             |
| AB0060 | <i>gltX1</i> | Glutamyl-tRNA synthetase                                                   |
| AB0061 | <i>rbpA</i>  | RNA-binding region RNP-1 (RNA recognition motif)                           |
| AB0062 |              | Two-component response regulator                                           |
| AB0063 |              | Two-component sensor histidine kinase                                      |
| AB0064 |              | Conserved hypothetical protein                                             |
| AB0065 |              | Hypothetical protein                                                       |
| AB0066 | <i>czcB</i>  | Cation efflux system, membrane fusion protein                              |
| AB0067 | <i>czcA</i>  | Heavy metal efflux pump                                                    |
| AB0068 |              | Conserved hypothetical periplasmic protein                                 |
| AB0070 |              | Fibronectin/fibrinogen-binding protein, putative                           |
| AB0071 |              | Conserved hypothetical protein                                             |
| AB0072 |              | Conserved hypothetical protein                                             |
| AB0073 |              | Hypothetical protein                                                       |
| AB0074 | <i>thrS</i>  | Threonyl-tRNA synthetase                                                   |
| AB0075 | <i>infC</i>  | Translation initiation factor IF-3                                         |
| AB0076 | <i>rpmI</i>  | 50S ribosomal protein L35                                                  |
| AB0077 | <i>rplT</i>  | 50S ribosomal protein L20                                                  |
| AB0078 |              | Rhodanese-like sulfur transferase                                          |
| AB0080 |              | Conserved hypothetical protein, putative sulfide:quinone reductase         |
| AB0081 | <i>mobA</i>  | Molybdopterin-guanine dinucleotide biosynthesis protein                    |
| AB0082 | <i>leuC</i>  | 3-isopropylmalate dehydratase, large subunit                               |
| AB0083 | <i>lspA</i>  | Lipoprotein signal peptidase                                               |
| AB0084 | <i>glmM</i>  | Phosphoglucosamine mutase                                                  |
| AB0085 | <i>rpsT</i>  | 30S ribosomal protein S20                                                  |
| AB0086 | <i>prfA</i>  | Peptide chain release factor 1                                             |
| AB0088 | <i>pstS</i>  | Phosphate ABC transporter, periplasmic phosphate-binding protein           |
| AB0089 |              | EAL/GGDEF domain protein                                                   |
| AB0090 | <i>pstC</i>  | Phosphate ABC transporter, permease protein                                |
| AB0091 | <i>pstA</i>  | Phosphate ABC transporter, permease protein                                |
| AB0092 | <i>pstB</i>  | Phosphate transporter, ATP-binding protein                                 |
| AB0093 |              | Phosphate transport system regulatory protein PhoU, putative               |
| AB0094 |              | Hypothetical protein                                                       |
| AB0095 |              | Two-component response regulator                                           |
| AB0096 |              | Two-component sensor histidine kinase                                      |
| AB0097 | <i>rplM</i>  | 50S ribosomal protein L13                                                  |
| AB0098 | <i>rpsI</i>  | 30S ribosomal protein S9                                                   |
| AB0099 | <i>appA</i>  | Oligopeptide ABC transporter, periplasmic substrate-binding protein        |
| AB0100 |              | Conserved hypothetical protein, HAD-superfamily hydrolase                  |
| AB0108 |              | Conserved hypothetical protein, putative ammonia monooxygenase             |
| AB0109 |              | Hypothetical protein                                                       |
| AB0110 |              | ABC transporter, periplasmic substrate-binding protein, putative           |
| AB0111 | <i>iamA</i>  | ABC transporter, ATP-binding protein                                       |
| AB0112 | <i>iamB</i>  | ABC transporter, permease protein                                          |
| AB0115 | <i>luxS</i>  | Autoinducer-2 production protein LuxS                                      |
| AB0116 |              | Hypothetical protein                                                       |
| AB0117 |              | Conserved hypothetical protein (DUF752 domain protein)                     |
| AB0118 | <i>dacA</i>  | Serine-type D-Ala-D-Ala carboxypeptidase                                   |
| AB0119 |              | Conserved hypothetical protein                                             |
| AB0121 | <i>metH</i>  | 5-methyltetrahydrofolate--homocysteine methyltransferase                   |
| AB0122 | <i>ilvE</i>  | Branched-chain amino-acid aminotransferase                                 |
| AB0123 |              | Conserved hypothetical protein, Band 7 family protein                      |
| AB0124 |              | Hypothetical protein                                                       |
| AB0125 | <i>hisI</i>  | Phosphoribosyl-AMP cyclohydrolase/ phosphoribosyl-ATP pyrophosphohydrolase |
| AB0126 |              | Hypothetical protein                                                       |

|        |              |                                                                                         |
|--------|--------------|-----------------------------------------------------------------------------------------|
| AB0127 | <i>mrp</i>   | ATP/GTP-binding protein                                                                 |
| AB0128 | <i>thiC</i>  | Thiamine biosynthesis protein ThiC                                                      |
| AB0129 |              | Conserved hypothetical protein                                                          |
| AB0130 | <i>ispDF</i> | 2-C-methyl-D-erythritol 4-phosphate cytidyl transferase/synthase                        |
| AB0131 |              | Two-component response regulator                                                        |
| AB0132 | <i>pgpA</i>  | Phosphatidylglycerophosphatase A                                                        |
| AB0134 | <i>carA</i>  | Carbamoylphosphate synthase, small subunit                                              |
| AB0135 |              | Conserved hypothetical protein (DUF507 domain protein)                                  |
| AB0136 | <i>purA</i>  | Adenylosuccinate synthetase                                                             |
| AB0137 |              | Conserved hypothetical protein, putative tRNA synthetase                                |
| AB0138 |              | Putative aminotransferase                                                               |
| AB0139 |              | Conserved hypothetical periplasmic protein                                              |
| AB0142 |              | Conserved hypothetical protein, LigB family protein                                     |
| AB0143 | <i>pirA</i>  | Pirin                                                                                   |
| AB0144 | <i>gapB</i>  | Glyceraldehyde-3-phosphate dehydrogenase B                                              |
| AB0145 | <i>purM</i>  | Phosphoribosylaminoimidazole synthetase                                                 |
| AB0146 | <i>speE</i>  | Spermidine synthase                                                                     |
| AB0147 | <i>coaE</i>  | Dephospho-CoA kinase                                                                    |
| AB0148 | <i>dapF</i>  | Diaminopimelate epimerase                                                               |
| AB0149 | <i>purT</i>  | Phosphoribosylglycinamide formyltransferase 2                                           |
| AB0150 |              | Transcriptional regulator, MarR family                                                  |
| AB0151 |              | Hypothetical protein                                                                    |
| AB0153 | <i>ubiA</i>  | 4-hydroxybenzoate octaprenyltransferase                                                 |
| AB0155 | <i>miaA</i>  | tRNA delta(2)-isopentenylpyrophosphate transferase                                      |
| AB0156 | <i>rpmE</i>  | 50S ribosomal protein L31                                                               |
| AB0157 |              | Conserved hypothetical protein, putative methyltransferase                              |
| AB0158 |              | tRNA methyltransferase, TrmH family                                                     |
| AB0159 |              | Conserved hypothetical protein                                                          |
| AB0160 | <i>aspB1</i> | Aspartate aminotransferase, aminotransferase, classes I and II                          |
| AB0161 | <i>hom</i>   | Homoserine dehydrogenase                                                                |
| AB0162 | <i>traT</i>  | TraT complement resistance protein precursor                                            |
| AB0163 | <i>cdsA</i>  | CDP-diglyceride synthetase CdsA                                                         |
| AB0164 | <i>dxr</i>   | 1-deoxy-D-xylulose 5-phosphate reductoisomerase                                         |
| AB0166 |              | Conserved hypothetical protein (DUF1234 domain protein)                                 |
| AB0167 | <i>gcp</i>   | O-sialoglycoprotein endopeptidase                                                       |
| AB0168 |              | Hypothetical protein                                                                    |
| AB0169 |              | Conserved hypothetical protein, putative carbohydrate kinase                            |
| AB0170 |              | Conserved hypothetical periplasmic protein                                              |
| AB0171 | <i>thiG</i>  | Thiazole biosynthesis protein ThiG                                                      |
| AB0172 | <i>pycB1</i> | Pyruvate/oxaloacetate carboxyltransferase                                               |
| AB0173 |              | Hypothetical protein                                                                    |
| AB0174 |              | Transcriptional regulator, AraC family                                                  |
| AB0176 |              | Methyl-accepting chemotaxis protein                                                     |
| AB0177 |              | DNA/RNA helicase (DEAD/DEAH BOX family)                                                 |
| AB0178 | <i>tkt</i>   | Transketolase                                                                           |
| AB0179 | <i>lrgA</i>  | LrgA family protein                                                                     |
| AB0180 | <i>lrgB</i>  | LrgB-like protein                                                                       |
| AB0181 |              | Conserved hypothetical protein                                                          |
| AB0183 |              | Conserved hypothetical protein (DUF350 domain protein)                                  |
| AB0184 | <i>dctA</i>  | C4-dicarboxylate transport protein                                                      |
| AB0185 |              | Hypothetical protein                                                                    |
| AB0190 | <i>aas</i>   | 2-acylglycerophosphoethanolamine acyltransferase / acyl-acyl carrier protein synthetase |
| AB0191 | <i>glnD</i>  | Protein-P-II uridylyltransferase                                                        |
| AB0192 |              | Conserved hypothetical protein                                                          |
| AB0193 |              | Conserved hypothetical protein                                                          |

|        |              |                                                                                |
|--------|--------------|--------------------------------------------------------------------------------|
| AB0194 |              | Hypothetical protein, ankyrin repeat family                                    |
| AB0195 | <i>glnB1</i> | Nitrogen regulatory protein PII                                                |
| AB0196 | <i>pyrC</i>  | Dihydroorotase                                                                 |
| AB0197 | <i>fliM</i>  | Flagellar motor switch protein FliM                                            |
| AB0202 |              | Hypothetical protein                                                           |
| AB0203 | <i>fliL</i>  | Flagellar basal body-associated protein                                        |
| AB0204 |              | Hypothetical protein                                                           |
| AB0205 | <i>flgH</i>  | Flagellar basal body L-ring protein FlgH                                       |
| AB0206 | <i>flgK</i>  | Flagellar hook-associated protein FlgK                                         |
| AB0207 | <i>fliD</i>  | Flagellar hook-associated protein 2                                            |
| AB0208 | <i>fliS</i>  | Flagellar protein FliS                                                         |
| AB0209 |              | Hypothetical protein                                                           |
| AB0210 | <i>tilS</i>  | tRNA(Ile)-lysine synthase                                                      |
| AB0211 | <i>yliG</i>  | MiaB-like tRNA modifying enzyme                                                |
| AB0212 | <i>panC</i>  | Pantoate--beta-alanine ligase                                                  |
| AB0213 |              | Oligopeptide ABC transporter, permease protein                                 |
| AB0214 | <i>acpS</i>  | Holo-(acyl-carrier-protein) synthase                                           |
| AB0215 | <i>gltS</i>  | Sodium:glutamate symporter                                                     |
| AB0216 |              | Conserved hypothetical protein, putative Holliday junction resolvase           |
| AB0217 | <i>metF</i>  | 5,10-methylenetetrahydrofolate reductase                                       |
| AB0218 | <i>serB</i>  | 3-phosphoserine phosphatase                                                    |
| AB0219 | <i>tal</i>   | Transaldolase                                                                  |
| AB0220 | <i>dhs</i>   | 3-deoxy-D-arabinoheptulosonate 7-phosphate synthase (DAHP synthetase class II) |
| AB0221 | <i>tsx</i>   | Nucleoside-specific channel-forming protein                                    |
| AB0224 |              | Conserved hypothetical DNA binding protein                                     |
| AB0225 |              | Conserved hypothetical protein                                                 |
| AB0226 | <i>gatC</i>  | Glutamyl-tRNA(Gln) amidotransferase, subunit C                                 |
| AB0227 | <i>tgt</i>   | Queuine tRNA-ribosyltransferase                                                |
| AB0228 |              | Conserved hypothetical protein                                                 |
| AB0229 | <i>aspB2</i> | Aspartate aminotransferase, aminotransferase, classes I and II                 |
| AB0232 | <i>dprA</i>  | SMF protein, DNA processing chain A                                            |
| AB0233 |              | Conserved hypothetical protein                                                 |
| AB0234 | <i>ilvC</i>  | Ketol-acid reductoisomerase                                                    |
| AB0235 | <i>rnr</i>   | Ribonuclease R                                                                 |
| AB0236 |              | Hypothetical protein (DUF180 domain protein)                                   |
| AB0237 |              | Conserved hypothetical protein                                                 |
| AB0238 | <i>rpsF</i>  | 30S ribosomal protein S6                                                       |
| AB0239 | <i>ssb</i>   | Single-strand DNA binding protein                                              |
| AB0240 | <i>rpsR</i>  | 30S ribosomal protein S18                                                      |
| AB0241 |              | Hypothetical protein                                                           |
| AB0242 | <i>cysS</i>  | CysteinyI-tRNA synthetase                                                      |
| AB0243 | <i>nusA</i>  | Transcription termination factor NusA                                          |
| AB0244 |              | Conserved hypothetical protein                                                 |
| AB0245 | <i>miaB</i>  | tRNA-methylthiotransferase                                                     |
| AB0246 |              | Putative lipoprotein                                                           |
| AB0247 |              | Hypothetical protein                                                           |
| AB0248 |              | Conserved hypothetical protein                                                 |
| AB0249 |              | Hypothetical protein                                                           |
| AB0250 | <i>cynT2</i> | Carbonic anhydrase                                                             |
| AB0251 | <i>bioF</i>  | 8-amino-7-oxononanoate synthase                                                |
| AB0252 |              | Conserved hypothetical protein                                                 |
| AB0253 |              | Conserved hypothetical protein                                                 |
| AB0254 |              | OmpA domain protein                                                            |
| AB0255 | <i>pyk</i>   | Pyruvate kinase                                                                |
| AB0256 | <i>argD1</i> | N-acetylornithine aminotransferase                                             |

|        |              |                                                                                  |
|--------|--------------|----------------------------------------------------------------------------------|
| AB0257 | <i>cti</i>   | Fatty acid cis/trans isomerase                                                   |
| AB0258 | <i>pyrB</i>  | Aspartate carbamoyltransferase                                                   |
| AB0259 | <i>pabB</i>  | Para-aminobenzoate synthase, glutamine amidotransferase component I              |
| AB0262 |              | Conserved hypothetical protein, putative para-aminobenzoate synthase component I |
| AB0263 | <i>phnA</i>  | Phosphonoacetate hydrolase                                                       |
| AB0264 |              | Conserved hypothetical protein, predicted metal-dependent hydrolase              |
| AB0267 |              | Hypothetical periplasmic protein                                                 |
| AB0268 |              | Conserved hypothetical protein                                                   |
| AB0269 |              | Conserved hypothetical protein, probable periplasmic protein                     |
| AB0271 |              | D-isomer specific 2-hydroxyacid dehydrogenase, NAD-binding                       |
| AB0272 |              | Conserved hypothetical protein                                                   |
| AB0273 | <i>prpB</i>  | Carboxyphosphoenolpyruvate phosphomutase PrpB                                    |
| AB0274 | <i>prpC</i>  | 2-methylcitrate synthase/citrate synthase 2                                      |
| AB0275 | <i>acnA</i>  | Aconitate hydratase 1                                                            |
| AB0276 |              | Conserved hypothetical protein (DUF453 domain protein)                           |
| AB0277 |              | Hypothetical protein                                                             |
| AB0278 |              | Isochorismatase hydrolase                                                        |
| AB0280 | <i>hemC</i>  | Porphobilinogen deaminase                                                        |
| AB0281 |              | Conserved hypothetical protein, putative DSBA oxidoreductase                     |
| AB0282 | <i>dnaX</i>  | DNA polymerase III, gamma and tau subunits                                       |
| AB0283 | <i>murI</i>  | Glutamate racemase                                                               |
| AB0284 | <i>gdhA</i>  | NADP-specific glutamate dehydrogenase                                            |
| AB0285 | <i>rho</i>   | Transcription termination factor Rho                                             |
| AB0286 | <i>tsaA</i>  | Alkyl hydroperoxide reductase/ Thiol specific antioxidant                        |
| AB0287 | <i>fdxA</i>  | Ferredoxin                                                                       |
| AB0288 | <i>ndk</i>   | Nucleoside diphosphate kinase                                                    |
| AB0289 |              | Conserved hypothetical protein                                                   |
| AB0290 | <i>rpmF</i>  | 50S ribosomal protein L32                                                        |
| AB0291 | <i>plsX</i>  | Fatty acid/phospholipid synthesis protein                                        |
| AB0292 | <i>fabH</i>  | 3-oxoacyl-(acyl carrier protein) synthase III                                    |
| AB0294 |              | Conserved hypothetical protein, predicted ATP/GTP-binding protein                |
| AB0295 |              | Conserved hypothetical protein, predicted ATP/GTP-binding protein                |
| AB0296 | <i>frdB</i>  | Fumarate reductase, iron-sulfur protein                                          |
| AB0297 | <i>frdA</i>  | Fumarate reductase, flavoprotein subunit                                         |
| AB0298 | <i>frdC</i>  | Fumarate reductase, cytochrome b subunit                                         |
| AB0299 | <i>nuoN</i>  | NADH-quinone oxidoreductase, N subunit                                           |
| AB0300 | <i>nuoM</i>  | NADH-quinone oxidoreductase, M subunit                                           |
| AB0301 | <i>nuoL</i>  | NADH-quinone oxidoreductase, L subunit                                           |
| AB0302 | <i>nuoK</i>  | NADH-quinone oxidoreductase, K subunit                                           |
| AB0303 | <i>nuoJ</i>  | NADH-quinone oxidoreductase, J subunit                                           |
| AB0304 | <i>nuoI</i>  | NADH-quinone oxidoreductase, I subunit                                           |
| AB0305 | <i>nuoH</i>  | NADH-quinone oxidoreductase, H subunit                                           |
| AB0306 | <i>nuoG</i>  | NADH-quinone oxidoreductase, G subunit                                           |
| AB0307 | <i>gltA</i>  | Citrate synthase                                                                 |
| AB0308 | <i>nuoF</i>  | NADH-quinone oxidoreductase, F subunit                                           |
| AB0309 | <i>nuoE</i>  | NADH-quinone oxidoreductase, E subunit                                           |
| AB0310 | <i>nuoCD</i> | NADH-quinone oxidoreductase, C/D subunit                                         |
| AB0312 | <i>nuoA</i>  | NADH-quinone oxidoreductase, A subunit                                           |
| AB0313 |              | Aminotransferase/L-cysteine desulfhydrase                                        |
| AB0314 |              | Carboxylase-related protein                                                      |
| AB0315 |              | Conserved hypothetical membrane protein (DUF1212 domain protein)                 |
| AB0316 |              | Conserved hypothetical membrane protein (DUF1212 domain protein)                 |
| AB0317 |              | Conserved hypothetical protein                                                   |
| AB0318 |              | Transcriptional activator, putative, Baf family                                  |
| AB0319 | <i>hisG</i>  | ATP phosphoribosyltransferase                                                    |

|        |              |                                                                              |
|--------|--------------|------------------------------------------------------------------------------|
| AB0320 |              | Conserved hypothetical protein, putative methyltransferase                   |
| AB0321 |              | Methyl-accepting chemotaxis protein                                          |
| AB0324 | <i>trpS</i>  | Tryptophanyl-tRNA synthetase                                                 |
| AB0325 |              | TonB-dependent receptor protein                                              |
| AB0326 |              | Conserved hypothetical membrane protein                                      |
| AB0333 |              | Conserved hypothetical membrane protein (DUF204 domain protein)              |
| AB0336 |              | ABC transporter, ATP-binding/permease protein                                |
| AB0341 |              | Hypothetical protein                                                         |
| AB0342 |              | Cation efflux system, membrane protein                                       |
| AB0343 | <i>serS</i>  | Seryl-tRNA synthetase                                                        |
| AB0344 | <i>nrfI</i>  | Cytochrome c biogenesis protein                                              |
| AB0345 | <i>nrfA</i>  | Cytochrome c552 nitrite reductase catalytic subunit NrfA                     |
| AB0346 | <i>nrfH</i>  | Cytochrome c nitrite reductase, small subunit NrfH                           |
| AB0347 |              | Hypothetical protein                                                         |
| AB0348 |              | EAL/GGDEF/PAS domain protein                                                 |
| AB0349 |              | Methyl-accepting chemotaxis protein                                          |
| AB0350 | <i>napD</i>  | Putative periplasmic nitrate reductase assembly protein NapD                 |
| AB0351 | <i>napL</i>  | Putative periplasmic protein                                                 |
| AB0352 | <i>napF</i>  | Ferredoxin-type protein NapF                                                 |
| AB0353 | <i>napB</i>  | Periplasmic nitrate reductase, small subunit, cytochrome c-type protein NapB |
| AB0354 | <i>napH</i>  | Methylamine utilization ferredoxin-type protein NapH                         |
| AB0355 | <i>napG</i>  | Fe-S ferredoxin-type protein NapG                                            |
| AB0356 | <i>napA</i>  | Periplasmic nitrate reductase, large subunit                                 |
| AB0357 | <i>dctP</i>  | C4-dicarboxylate-binding periplasmic protein                                 |
| AB0358 | <i>dctQ</i>  | C4-dicarboxylate transport system, permease small subunit                    |
| AB0359 | <i>dctM</i>  | C4-dicarboxylate transport protein                                           |
| AB0360 |              | Two-component sensor histidine kinase                                        |
| AB0361 |              | Two-component response regulator                                             |
| AB0362 | <i>menG</i>  | S-adenosylmethionine:2-demethylmenaquinone methyltransferase                 |
| AB0363 | <i>cysG</i>  | Uroporphyrin-III C-methyltransferase                                         |
| AB0364 |              | Conserved hypothetical protein                                               |
| AB0365 |              | Putative transcriptional regulator                                           |
| AB0366 |              | Glycosyltransferase, putative                                                |
| AB0367 | <i>moaA</i>  | Molybdopterin biosynthesis protein A                                         |
| AB0368 | <i>rpsO</i>  | 30S ribosomal protein S15                                                    |
| AB0369 |              | Transcriptional regulator, BadM/Rrf2 family                                  |
| AB0370 |              | Conserved hypothetical protein                                               |
| AB0371 |              | CoA-binding domain protein                                                   |
| AB0372 |              | Two-component sensor histidine kinase                                        |
| AB0373 |              | Two-component response regulator                                             |
| AB0374 | <i>ppiC</i>  | Peptidyl-prolyl cis-trans isomerase                                          |
| AB0375 | <i>fba</i>   | Fructose-bisphosphate aldolase                                               |
| AB0376 | <i>ald</i>   | Aldehyde dehydrogenase                                                       |
| AB0377 |              | Conserved hypothetical protein (DUF779 domain protein)                       |
| AB0378 | <i>exbD1</i> | Biopolymer transport protein ExbD                                            |
| AB0379 | <i>exbB1</i> | Biopolymer transport protein ExbB                                            |
| AB0380 |              | Conserved hypothetical protein                                               |
| AB0381 | <i>aroK</i>  | Shikimate kinase                                                             |
| AB0382 | <i>hisD</i>  | Histidinol dehydrogenase                                                     |
| AB0383 |              | Conserved hypothetical protein                                               |
| AB0384 | <i>ispB</i>  | Octaprenyl-diphosphate synthase                                              |
| AB0385 | <i>hemA</i>  | Glutamyl-tRNA reductase                                                      |
| AB0386 | <i>proS</i>  | Prolyl-tRNA synthetase                                                       |
| AB0387 | <i>mscS</i>  | Mechanosensitive ion channel                                                 |
| AB0388 |              | tRNA nucleotidyltransferase/poly(A) polymerase                               |

|        |              |                                                           |
|--------|--------------|-----------------------------------------------------------|
| AB0389 |              | Conserved hypothetical protein                            |
| AB0390 |              | Conserved hypothetical protein                            |
| AB0391 | <i>Int</i>   | Apolipoprotein N-acyltransferase                          |
| AB0392 | <i>yajC</i>  | Preprotein translocase subunit                            |
| AB0393 | <i>secD</i>  | Protein-export membrane protein SecD                      |
| AB0394 | <i>secF</i>  | Protein-export membrane protein SecF                      |
| AB0395 |              | Hypothetical protein                                      |
| AB0396 |              | Hypothetical protein                                      |
| AB0397 | <i>motB</i>  | Flagellar motor component MotB                            |
| AB0398 | <i>motA</i>  | Flagellar motor component MotA                            |
| AB0399 |              | Conserved hypothetical protein                            |
| AB0400 | <i>leuS</i>  | Leucyl-tRNA synthetase                                    |
| AB0401 |              | Conserved hypothetical protein                            |
| AB0402 | <i>folC</i>  | Folypolyglutamate synthase/dihydrofolate synthase         |
| AB0403 |              | Probable helicase                                         |
| AB0404 |              | Phospholipid/glycerol acyltransferase, possible hemolysin |
| AB0405 |              | Conserved hypothetical protein                            |
| AB0406 |              | Hypothetical protein                                      |
| AB0407 |              | Hypothetical protein                                      |
| AB0408 | <i>mfd</i>   | Transcription-repair coupling factor                      |
| AB0409 |              | Putative acetyltransferase                                |
| AB0410 |              | Conserved hypothetical protein                            |
| AB0411 |              | Hypothetical periplasmic protein                          |
| AB0412 | <i>ompR</i>  | Two-component response regulator                          |
| AB0413 |              | Two-component sensor histidine kinase                     |
| AB0414 |              | Conserved hypothetical protein                            |
| AB0415 |              | Methyl-accepting chemotaxis protein                       |
| AB0416 |              | Two-component response regulator                          |
| AB0417 |              | Two-component sensor histidine kinase                     |
| AB0418 |              | Two-component sensor histidine kinase                     |
| AB0419 |              | Conserved hypothetical protein                            |
| AB0420 |              | Hypothetical protein                                      |
| AB0421 |              | Hypothetical protein                                      |
| AB0422 | <i>ubiE</i>  | Ubiquinone\menaquinone biosynthesis methlytransferase     |
| AB0423 | <i>xseA</i>  | Exodeoxyribonuclease VII, large subunit                   |
| AB0425 | <i>cheW</i>  | Chemotaxis protein CheW                                   |
| AB0426 |              | Peptidyl-prolyl cis-trans isomerase-like protein          |
| AB0427 | <i>panD</i>  | Aspartate 1-decarboxylase                                 |
| AB0428 |              | Conserved hypothetical protein (DUF149 domain protein)    |
| AB0429 | <i>ispA</i>  | Geranyltranstransferase                                   |
| AB0431 | <i>groEL</i> | 60 kDa chaperonin                                         |
| AB0432 |              | Two-component sensor histidine kinase                     |
| AB0433 |              | Two-component response regulator                          |
| AB0434 |              | Ser/Thr protein phosphatase family protein                |
| AB0435 |              | Conserved hypothetical protein                            |
| AB0436 |              | Hypothetical periplasmic protein                          |
| AB0437 |              | Hypothetical protein                                      |
| AB0438 |              | Hypothetical protein                                      |
| AB0439 |              | ABC transporter, ATP-binding protein                      |
| AB0440 |              | ABC transporter, permease protein                         |
| AB0442 |              | Hypothetical protein                                      |
| AB0443 | <i>suhB</i>  | Inositol-1-monophosphatase                                |
| AB0444 | <i>glmS</i>  | Glucosamine-fructose-6-phosphate aminotransferase         |
| AB0445 | <i>metK</i>  | S-adenosylmethionine synthetase                           |
| AB0446 | <i>accD</i>  | Acetyl-CoA carboxylase, carboxyltransferase, beta subunit |

|        |              |                                                                                   |
|--------|--------------|-----------------------------------------------------------------------------------|
| AB0447 | <i>thiE</i>  | Thiamine-phosphate pyrophosphorylase                                              |
| AB0448 |              | Conserved hypothetical protein (DUF163 domain protein)                            |
| AB0449 |              | Conserved hypothetical protein                                                    |
| AB0450 |              | Probable tRNA-dihydrouridine synthase                                             |
| AB0451 | <i>prmA</i>  | Ribosomal protein L11 methyltransferase                                           |
| AB0452 | <i>ftsH1</i> | Cell division protein FtsH                                                        |
| AB0456 | <i>leuA1</i> | 2-isopropylmalate synthase                                                        |
| AB0457 |              | Conserved hypothetical protein                                                    |
| AB0458 |              | Conserved hypothetical protein                                                    |
| AB0459 | <i>mutS1</i> | Mismatch repair ATPase                                                            |
| AB0465 |              | Quinolipoprotein amine dehydrogenase, 60 kDa ( $\alpha$ ) subunit                 |
| AB0466 |              | Quinolipoprotein amine dehydrogenase, putative quinone cofactor formation protein |
| AB0467 |              | Quinolipoprotein amine dehydrogenase, 9 kDa ( $\gamma$ ) subunit                  |
| AB0468 |              | Quinolipoprotein amine dehydrogenase, 40 kDa ( $\beta$ ) subunit                  |
| AB0469 |              | ABC transporter, ATP-binding protein                                              |
| AB0470 |              | Conserved hypothetical protein                                                    |
| AB0471 |              | Conserved hypothetical protein                                                    |
| AB0472 |              | GGDEF domain protein                                                              |
| AB0473 | <i>hisA</i>  | Phosphoribosylformimino-5-aminoimidazole carboxamide ribotide isomerase           |
| AB0474 |              | Conserved hypothetical protein (DUF1731 domain protein)                           |
| AB0475 | <i>hisH1</i> | Glutamine amidotransferase HisH                                                   |
| AB0476 | <i>ctsW</i>  | Transformation system protein                                                     |
| AB0479 | <i>lepA</i>  | GTP-binding protein LepA                                                          |
| AB0480 |              | Conserved hypothetical protein (DUF156 domain protein)                            |
| AB0481 |              | Heavy-metal transporting P-type ATPase                                            |
| AB0483 | <i>cadF</i>  | Outer membrane fibronectin-binding protein                                        |
| AB0484 | <i>prsA</i>  | Ribose-phosphate pyrophosphokinase                                                |
| AB0485 |              | Conserved hypothetical protein                                                    |
| AB0486 | <i>trmU1</i> | tRNA (5-methylaminomethyl-2-thiouridylate)-methyltransferase                      |
| AB0487 | <i>trmU2</i> | tRNA (5-methylaminomethyl-2-thiouridylate)-methyltransferase                      |
| AB0488 | <i>folK</i>  | 2-amino-4-hydroxy-6- hydroxymethyldihydropteridine pyrophosphokinase              |
| AB0489 | <i>pepQ</i>  | Prolidase (Xaa-Pro dipeptidase) (pepQ)                                            |
| AB0490 | <i>aroQ</i>  | 3-dehydroquinate dehydratase                                                      |
| AB0491 |              | Amidohydrolase family protein                                                     |
| AB0492 | <i>pspA</i>  | Protease IV (PspA)                                                                |
| AB0494 | <i>ackA1</i> | Acetate kinase                                                                    |
| AB0495 | <i>pta</i>   | Phosphate acetyltransferase                                                       |
| AB0496 | <i>ackA2</i> | Acetate kinase                                                                    |
| AB0497 |              | Cation efflux protein                                                             |
| AB0498 | <i>ackA3</i> | Acetate kinase                                                                    |
| AB0499 | <i>dnaQ1</i> | DNA polymerase III, epsilon subunit                                               |
| AB0500 |              | Conserved hypothetical protein (DUF294 domain protein)                            |
| AB0501 |              | Sodium:solute symporter family protein                                            |
| AB0502 |              | Conserved hypothetical protein (DUF485 domain protein)                            |
| AB0504 |              | Sodium:solute symporter family protein                                            |
| AB0505 |              | Conserved hypothetical protein (DUF485 domain protein)                            |
| AB0506 | <i>dnaQ2</i> | DNA polymerase III, epsilon subunit                                               |
| AB0507 |              | Cyclic nucleotide-binding domain protein                                          |
| AB0508 |              | Sodium:solute symporter (Ssf family)                                              |
| AB0509 |              | Conserved hypothetical protein                                                    |
| AB0510 |              | Two-component response regulator                                                  |
| AB0511 |              | Two-component sensor histidine kinase                                             |
| AB0512 |              | CinA-like protein                                                                 |
| AB0513 | <i>mgo</i>   | Malate:quinone oxidoreductase                                                     |
| AB0514 | <i>ileS</i>  | Isoleucyl-tRNA synthetase                                                         |

|        |              |                                                                   |
|--------|--------------|-------------------------------------------------------------------|
| AB0516 |              | Conserved hypothetical NifU-like protein                          |
| AB0517 |              | Conserved hypothetical protein                                    |
| AB0518 | <i>murE</i>  | UDP-N-acetylmuramoylalanyl-D-glutamyl-2, 6-diaminopimelate ligase |
| AB0520 |              | C4-dicarboxylate transporter/malic acid transport protein         |
| AB0521 | <i>tas</i>   | Oxidoreductase Tas, aldo/keto reductase family                    |
| AB0522 | <i>pitA</i>  | Phosphate transporter family protein                              |
| AB0523 |              | Methyl-accepting chemotaxis protein                               |
| AB0524 |              | Hypothetical protein                                              |
| AB0525 |              | Methyl-accepting chemotaxis protein                               |
| AB0526 |              | Conserved hypothetical protein                                    |
| AB0527 |              | Conserved hypothetical protein                                    |
| AB0528 |              | Peptidase, M48 family                                             |
| AB0529 |              | DNA recombination protein RmuC homolog                            |
| AB0530 |              | Integral membrane domain protein (DUF6 domain protein)            |
| AB0531 | <i>moeA2</i> | Molybdenum cofactor biosynthesis protein A                        |
| AB0532 |              | Hypothetical protein                                              |
| AB0533 |              | Conserved hypothetical protein                                    |
| AB0534 |              | Conserved hypothetical protein (DUF523 domain protein)            |
| AB0535 |              | Hypothetical protein                                              |
| AB0536 |              | Hypothetical protein                                              |
| AB0537 | <i>rpsB</i>  | 30S ribosomal protein S2                                          |
| AB0538 | <i>tsf</i>   | Translation elongation factor EF-Ts                               |
| AB0539 |              | ABC transporter, ATP-binding protein                              |
| AB0540 |              | Hypothetical protein                                              |
| AB0541 | <i>gmk</i>   | Guanylate kinase                                                  |
| AB0542 |              | EAL/GGDEF domain protein                                          |
| AB0543 |              | Cation-transporting ATPase, P-type                                |
| AB0544 |              | Hypothetical protein                                              |
| AB0545 |              | Conserved hypothetical protein, possible cytochrome c-553         |
| AB0546 |              | Oligopeptide ABC transporter, ATP-binding protein                 |
| AB0547 | <i>hemH</i>  | Ferrochelataase                                                   |
| AB0548 | <i>feoB1</i> | Ferrous iron transport protein B                                  |
| AB0549 |              | Hypothetical protein                                              |
| AB0550 |              | Conserved hypothetical protein (DUF218 domain protein)            |
| AB0551 |              | ABC transporter, ATP-binding protein                              |
| AB0552 |              | ABC transporter, permease protein                                 |
| AB0553 |              | Conserved hypothetical protein                                    |
| AB0554 | <i>tpx</i>   | Thiol peroxidase                                                  |
| AB0555 |              | Conserved hypothetical secreted protein                           |
| AB0556 |              | Putative efflux protein, bile acid:sodium symporter family        |
| AB0558 |              | Hypothetical protein                                              |
| AB0562 |              | Probable sodium/hydrogen antiporter                               |
| AB0584 |              | Hypothetical protein                                              |
| AB0585 |              | Major facilitator superfamily transporter                         |
| AB0586 |              | HAM1 protein homolog                                              |
| AB0588 |              | Hypothetical protein                                              |
| AB0589 |              | Hypothetical protein                                              |
| AB0590 | <i>proC</i>  | Pyrroline-5-carboxylate reductase                                 |
| AB0591 |              | Conserved hypothetical membrane protein                           |
| AB0592 | <i>lon</i>   | ATP-dependent protease La                                         |
| AB0593 |              | Rhomboid-like protein                                             |
| AB0594 |              | Protein tyrosine phosphatase                                      |
| AB0595 |              | Conserved hypothetical protein                                    |
| AB0596 |              | Hypothetical TPR repeat protein                                   |
| AB0597 |              | Transcriptional regulator, MarR family                            |

|        |              |                                                                               |
|--------|--------------|-------------------------------------------------------------------------------|
| AB0602 |              | Methyl-accepting chemotaxis protein                                           |
| AB0603 |              | Conserved hypothetical protein                                                |
| AB0604 |              | Membrane protein, putative (DUF6 domain protein)                              |
| AB0609 | <i>sufD</i>  | Fe-S assembly protein                                                         |
| AB0610 | <i>sufC</i>  | Fe-S assembly ABC transporter, ATP-binding protein                            |
| AB0611 | <i>sufB</i>  | Fe-S assembly ABC transporter, permease protein                               |
| AB0612 | <i>iscS</i>  | Cysteine desulfurase/aminotransferase (IscS/NifS)                             |
| AB0613 | <i>iscU</i>  | NifU-like protein                                                             |
| AB0614 |              | Conserved hypothetical protein                                                |
| AB0615 |              | GGDEF domain protein                                                          |
| AB0616 | <i>argH</i>  | Argininosuccinate lyase                                                       |
| AB0617 | <i>cheV</i>  | Chemotaxis signal transduction protein CheV                                   |
| AB0626 |              | TonB-dependent receptor protein                                               |
| AB0627 |              | Methyl-accepting chemotaxis protein                                           |
| AB0628 |              | Hypothetical protein                                                          |
| AB0630 |              | Two-component response regulator                                              |
| AB0631 |              | Two-component sensor histidine kinase                                         |
| AB0632 |              | Methyl-accepting chemotaxis protein                                           |
| AB0633 |              | Methyl-accepting chemotaxis protein                                           |
| AB0634 |              | Conserved hypothetical protein                                                |
| AB0636 | <i>rpiB</i>  | Ribose 5-phosphate isomerase                                                  |
| AB0637 | <i>lepP</i>  | Signal peptidase I                                                            |
| AB0638 | <i>folD</i>  | 5,10-methylene-tetrahydrofolate dehydrogenase/5,10-methylene-tetrahydrofolate |
| AB0639 | <i>rplY</i>  | 50S ribosomal protein L25                                                     |
| AB0640 | <i>pth</i>   | Peptidyl-tRNA hydrolase                                                       |
| AB0641 |              | Conserved hypothetical membrane protein                                       |
| AB0642 |              | Hypothetical protein                                                          |
| AB0643 | <i>amiA</i>  | N-acetylmuramoyl-L-alanine amidase                                            |
| AB0644 | <i>npd</i>   | 2-nitropropane dioxygenase                                                    |
| AB0645 | <i>tyrS</i>  | Tyrosyl-tRNA synthetase                                                       |
| AB0646 | <i>spoT</i>  | ppGpp synthetase/guanosine-3',5'-bis(diphosphate) 3'-pyrophosphohydrolase     |
| AB0647 | <i>rpoZ</i>  | DNA-directed RNA polymerase, omega chain                                      |
| AB0648 | <i>pyrH</i>  | Uridylate kinase                                                              |
| AB0649 |              | Conserved hypothetical protein                                                |
| AB0650 | <i>pdxA</i>  | Pyridoxal phosphate biosynthetic protein A                                    |
| AB0651 | <i>pdxJ</i>  | Pyridoxal phosphate biosynthesis protein                                      |
| AB0652 | <i>trpE</i>  | Anthranilate synthase, component I                                            |
| AB0653 |              | Conserved hypothetical protein                                                |
| AB0654 | <i>glyA1</i> | Serine hydroxymethyltransferase                                               |
| AB0655 | <i>lysS</i>  | Lysyl-tRNA synthetase                                                         |
| AB0656 |              | Colicin V production protein                                                  |
| AB0657 | <i>ispG</i>  | 4-hydroxy-3-methylbut-2-en-1-yl diphosphate synthase                          |
| AB0658 |              | GGDEF domain protein                                                          |
| AB0659 | <i>dnaB</i>  | Replicative DNA helicase                                                      |
| AB0697 | <i>pglF</i>  | Sugar epimerase/dehydratase                                                   |
| AB0698 |              | Hypothetical protein                                                          |
| AB0699 | <i>ligA</i>  | ATP-dependent DNA ligase                                                      |
| AB0700 | <i>apt</i>   | Adenine phosphoribosyltransferase                                             |
| AB0701 | <i>trpB1</i> | Tryptophan synthase, beta chain                                               |
| AB0702 |              | Conserved hypothetical membrane protein                                       |
| AB0703 | <i>pepA</i>  | Aminopeptidase                                                                |
| AB0705 |              | TonB-dependent receptor protein                                               |
| AB0706 | <i>exbD2</i> | Biopolymer transport protein ExbD                                             |
| AB0707 | <i>exbB2</i> | Biopolymer transport protein ExbB                                             |
| AB0708 |              | Conserved hypothetical membrane protein                                       |

|        |             |                                                                  |
|--------|-------------|------------------------------------------------------------------|
| AB0709 |             | HlyD family secretion protein                                    |
| AB0710 |             | ABC transporter, ATP-binding protein                             |
| AB0711 |             | ABC transporter, permease protein                                |
| AB0712 |             | Hypothetical protein                                             |
| AB0714 |             | Heavy metal translocating P-type ATPase                          |
| AB0715 |             | Conserved hypothetical protein                                   |
| AB0716 |             | Conserved hypothetical protein                                   |
| AB0717 |             | Hypothetical protein                                             |
| AB0718 |             | Conserved hypothetical protein                                   |
| AB0719 |             | Conserved hypothetical protein                                   |
| AB0720 | <i>fur1</i> | Ferric uptake regulation protein                                 |
| AB0721 |             | Hypothetical protein                                             |
| AB0722 | <i>fumC</i> | Fumarate hydratase, class II                                     |
| AB0723 |             | Hypothetical protein                                             |
| AB0724 |             | Two-component sensor histidine kinase                            |
| AB0725 |             | Two-component response regulator                                 |
| AB0732 |             | Conserved hypothetical protein                                   |
| AB0733 | <i>cysJ</i> | Sulfite reductase, flavoprotein component                        |
| AB0734 |             | Conserved hypothetical protein (DUF466 domain protein)           |
| AB0735 | <i>cstA</i> | Carbon starvation protein A                                      |
| AB0736 |             | GTP-binding protein, putative                                    |
| AB0737 |             | Conserved hypothetical protein                                   |
| AB0738 |             | Conserved hypothetical protein                                   |
| AB0739 |             | Conserved hypothetical protein                                   |
| AB0740 |             | Conserved hypothetical protein (DUF1255 domain protein)          |
| AB0741 |             | Conserved hypothetical protein                                   |
| AB0743 | <i>thiL</i> | Thiamine monophosphate kinase                                    |
| AB0744 | <i>truD</i> | tRNA pseudouridine synthase D                                    |
| AB0746 |             | Methyl-accepting chemotaxis protein                              |
| AB0747 | <i>ruvA</i> | Holliday junction DNA helicase RuvA                              |
| AB0748 | <i>ddlA</i> | D-alanine--D-alanine ligase                                      |
| AB0749 |             | 2-hydroxy-6-oxohepta-2,4-dienoate hydrolase                      |
| AB0750 | <i>murF</i> | UDP-N-acetylmuramoylalanyl-D-glutamyl-2,6-diaminopimelate ligase |
| AB0751 |             | HIT family protein                                               |
| AB0753 |             | Hypothetical protein                                             |
| AB0754 | <i>rpsJ</i> | 30S ribosomal protein S10                                        |
| AB0755 | <i>rplC</i> | 50S ribosomal protein L3                                         |
| AB0756 | <i>rplD</i> | 50S ribosomal protein L4                                         |
| AB0757 | <i>rplW</i> | 50S ribosomal protein L23                                        |
| AB0758 | <i>rplB</i> | 50S ribosomal protein L2                                         |
| AB0759 | <i>rpsS</i> | 30S ribosomal protein S19                                        |
| AB0760 | <i>rplV</i> | 50S ribosomal protein L22                                        |
| AB0761 | <i>rpsC</i> | 30S ribosomal protein S3                                         |
| AB0762 | <i>rplP</i> | 50S ribosomal protein L16                                        |
| AB0763 | <i>rpmC</i> | 50S ribosomal protein L29                                        |
| AB0764 | <i>rpsQ</i> | 30S ribosomal protein S17                                        |
| AB0765 | <i>rplN</i> | 50S ribosomal protein L14                                        |
| AB0766 | <i>rplX</i> | 50S ribosomal protein L24                                        |
| AB0767 | <i>rplE</i> | 50S ribosomal protein L5                                         |
| AB0768 | <i>rpsN</i> | 30S ribosomal protein S14                                        |
| AB0769 | <i>rpsH</i> | 30S ribosomal protein S8                                         |
| AB0770 | <i>rplF</i> | 50S ribosomal protein L6                                         |
| AB0772 | <i>rpsE</i> | 30S ribosomal protein S5                                         |
| AB0773 | <i>rplO</i> | 50S ribosomal protein L15                                        |
| AB0774 | <i>secY</i> | Preprotein translocase, SecY subunit                             |

|        |              |                                                             |
|--------|--------------|-------------------------------------------------------------|
| AB0775 | <i>map</i>   | Methionine aminopeptidase                                   |
| AB0776 | <i>infA</i>  | Translation initiation factor IF-1                          |
| AB0777 |              | Conserved hypothetical protein                              |
| AB0778 |              | Conserved hypothetical protein                              |
| AB0779 | <i>aspS</i>  | Aspartyl-tRNA synthetase                                    |
| AB0780 |              | CheW-like chemotaxis protein                                |
| AB0782 | <i>adk1</i>  | Adenylate kinase                                            |
| AB0783 | <i>adk2</i>  | Adenylate kinase                                            |
| AB0784 |              | Molybdopterin binding domain protein                        |
| AB0786 |              | Zinc-containing NADP-dependent alcohol dehydrogenase        |
| AB0787 |              | Iron-containing NADP-dependent alcohol dehydrogenase        |
| AB0788 |              | Methyl-accepting chemotaxis protein                         |
| AB0789 | <i>alr</i>   | Alanine racemase                                            |
| AB0790 | <i>uvrC</i>  | Excinuclease ABC, subunit C                                 |
| AB0791 |              | Methyl-accepting chemotaxis protein                         |
| AB0816 |              | Hydrophobe/amphiphile efflux-1 family protein               |
| AB0817 |              | Multidrug efflux RND membrane fusion protein                |
| AB0818 |              | Outer membrane efflux protein                               |
| AB0820 |              | Hypothetical protein                                        |
| AB0824 | <i>xth</i>   | Exodeoxyribonuclease                                        |
| AB0825 |              | Hypothetical protein                                        |
| AB0826 |              | Conserved hypothetical protein (DUF81 domain protein)       |
| AB0827 |              | Conserved hypothetical protein                              |
| AB0828 |              | Outer membrane lipoprotein                                  |
| AB0829 |              | Conserved hypothetical protein                              |
| AB0830 |              | Conserved hypothetical protein                              |
| AB0831 |              | ABC transporter protein                                     |
| AB0832 |              | Conserved hypothetical protein                              |
| AB0835 |              | Two-component sensor histidine kinase                       |
| AB0836 |              | Carotenoid isomerase, putative                              |
| AB0837 | <i>phrB</i>  | Deoxyribodipyrimidine photolyase                            |
| AB0838 |              | Conserved hypothetical protein (DUF523/1722 domain protein) |
| AB0839 |              | Auxin efflux carrier protein, putative                      |
| AB0840 |              | Conserved hypothetical protein (DUF386 domain protein)      |
| AB0841 | <i>pgi</i>   | Glucose-6-phosphate isomerase                               |
| AB0842 | <i>galU</i>  | UTP--glucose-1-phosphate uridylyltransferase                |
| AB0843 |              | Phosphohexosemutase                                         |
| AB0844 |              | Methyl-accepting chemotaxis protein                         |
| AB0847 |              | Transcriptional regulator, LysR family                      |
| AB0848 | <i>trpC</i>  | Indole-3-glycerol phosphate synthase                        |
| AB0849 |              | Conserved hypothetical protein                              |
| AB0850 |              | Conserved hypothetical protein                              |
| AB0851 |              | Conserved hypothetical protein                              |
| AB0852 | <i>oorD</i>  | OorD subunit of 2-oxoglutarate:acceptor oxidoreductase      |
| AB0853 | <i>oorA</i>  | OorA subunit of 2-oxoglutarate:acceptor oxidoreductase      |
| AB0854 | <i>oorB</i>  | OorB subunit of 2-oxoglutarate:acceptor oxidoreductase      |
| AB0855 | <i>oorC</i>  | OorC subunit of 2-oxoglutarate:acceptor oxidoreductase      |
| AB0856 | <i>dnaQ3</i> | DNA polymerase III, epsilon subunit                         |
| AB0857 | <i>trpF</i>  | N-(5'phosphoribosyl)anthranilate isomerase                  |
| AB0858 | <i>rpe</i>   | Ribulose-phosphate 3-epimerase                              |
| AB0859 | <i>pldA</i>  | Outer membrane phospholipase A                              |
| AB0860 |              | Conserved hypothetical protein                              |
| AB0861 |              | Conserved hypothetical protein                              |
| AB0862 |              | Conserved hypothetical protein (DUF520 domain protein)      |
| AB0863 |              | Conserved hypothetical protein                              |

|        |              |                                                                            |
|--------|--------------|----------------------------------------------------------------------------|
| AB0864 |              | Conserved hypothetical membrane protein (DUF423)                           |
| AB0865 |              | Putative nucleotide phosphoribosyltransferase                              |
| AB0866 |              | Conserved hypothetical protein                                             |
| AB0867 |              | Hypothetical protein                                                       |
| AB0868 |              | Conserved hypothetical protein                                             |
| AB0869 |              | Membrane-associated zinc metalloprotease, putative                         |
| AB0870 | <i>pgsA</i>  | CDP-1,2-diacyl-sn-glycero-3-phosphate phosphatidyltransferase              |
| AB0871 |              | Oxidoreductase, short chain dehydrogenase/reductase family                 |
| AB0872 | <i>dapA</i>  | Dihydrodipicolinate synthase                                               |
| AB0873 |              | Putative zinc protease                                                     |
| AB0874 | <i>pyrD</i>  | Dihydroorotate dehydrogenase                                               |
| AB0875 | <i>msbA</i>  | Multidrug resistance protein MsbA                                          |
| AB0876 | <i>mviN</i>  | Virulence factor MviN protein                                              |
| AB0877 |              | Endonuclease/exonuclease/phosphatase                                       |
| AB0878 | <i>perR</i>  | Peroxide stress regulator                                                  |
| AB0880 |              | Conserved hypothetical protein                                             |
| AB0882 | <i>radA</i>  | DNA repair protein RadA                                                    |
| AB0883 |              | Conserved hypothetical protein                                             |
| AB0887 |              | Hypothetical protein                                                       |
| AB0888 | <i>ftsY</i>  | Signal recognition particle-docking GTPase FtsY                            |
| AB0889 |              | Putative lipoprotein thioredoxin                                           |
| AB0890 |              | Putative 5-formyltetrahydrofolate cyclo-ligase                             |
| AB0891 |              | HD/HDIG/KH domain protein                                                  |
| AB0892 |              | Putative methyltransferase                                                 |
| AB0893 |              | ABC transporter, permease protein                                          |
| AB0898 |              | Oxidoreductase, short-chain dehydrogenase/reductase family                 |
| AB0899 |              | Conserved hypothetical protein                                             |
| AB0901 |              | Cytochrome c family protein                                                |
| AB0905 |              | Two-component sensor histidine kinase                                      |
| AB0906 |              | Molybdenum transport system protein ModD, putative                         |
| AB0907 |              | GGDEF domain protein                                                       |
| AB0908 |              | GatB/YqeY family protein                                                   |
| AB0909 |              | ABC transporter, ATP-binding protein                                       |
| AB0910 |              | Conserved hypothetical protein                                             |
| AB0911 |              | Conserved hypothetical protein                                             |
| AB0912 |              | Conserved hypothetical protein                                             |
| AB0913 |              | Conserved hypothetical protein                                             |
| AB0914 |              | Hypothetical protein                                                       |
| AB0915 |              | Hypothetical protein                                                       |
| AB0916 |              | Conserved hypothetical protein                                             |
| AB0921 | <i>guaA</i>  | GMP synthase                                                               |
| AB0922 | <i>nadB</i>  | L-aspartate oxidase                                                        |
| AB0923 |              | Conserved hypothetical protein                                             |
| AB0924 |              | Conserved hypothetical protein (DUF45 domain protein)                      |
| AB0925 | <i>aspB3</i> | Aspartate aminotransferase, aminotransferase, classes I and II             |
| AB0926 |              | Cation efflux protein                                                      |
| AB0931 |              | Conserved hypothetical protein                                             |
| AB0932 |              | Conserved hypothetical protein                                             |
| AB0933 |              | Major facilitator superfamily protein, putative oxalate:formate antiporter |
| AB0934 |              | Conserved hypothetical protein                                             |
| AB0935 | <i>cbiM</i>  | Cobalamin (Vitamin B12) biosynthesis protein                               |
| AB0936 |              | Hypothetical protein                                                       |
| AB0938 |              | Cobalt ABC transporter, permease protein, putative                         |
| AB0939 |              | Cobalt ABC transporter, ATP-binding protein, putative                      |
| AB0951 |              | Conserved hypothetical protein                                             |

|        |             |                                                                            |
|--------|-------------|----------------------------------------------------------------------------|
| AB0954 |             | Conserved hypothetical protein                                             |
| AB0955 |             | Putative permease                                                          |
| AB0956 |             | Hypothetical protein                                                       |
| AB0957 |             | Hypothetical protein                                                       |
| AB0958 |             | Conserved hypothetical protein                                             |
| AB0959 |             | Hypothetical protein                                                       |
| AB0960 | <i>uvrA</i> | Excinuclease ABC, subunit A                                                |
| AB0961 |             | Conserved hypothetical protein                                             |
| AB0962 |             | Methyl-accepting chemotaxis protein                                        |
| AB0964 |             | Conserved hypothetical protein (DUF81 domain protein)                      |
| AB0966 | <i>cysE</i> | Serine acetyltransferase                                                   |
| AB0967 | <i>speA</i> | Arginine decarboxylase                                                     |
| AB0968 | <i>hisS</i> | Histidyl-tRNA synthetase                                                   |
| AB0969 | <i>tmk</i>  | Thymidylate kinase                                                         |
| AB0970 | <i>coaD</i> | Phosphopantetheine adenylyltransferase                                     |
| AB0971 | <i>ubiD</i> | Phenylacrylic acid decarboxylase                                           |
| AB0972 |             | Site-specific recombinase, resolvase family                                |
| AB0973 | <i>rplI</i> | 50S ribosomal protein L9                                                   |
| AB0974 | <i>hslV</i> | Heat shock protein HslVU, ATP-dependent protease subunit HslV              |
| AB0975 | <i>hslU</i> | Heat shock protein HslVU, ATP-dependent protease subunit HslU              |
| AB0976 |             | Hypothetical protein                                                       |
| AB0977 |             | TatD-related deoxyribonuclease                                             |
| AB0978 |             | Putative lytic murein transglycosylase                                     |
| AB0979 | <i>rlpA</i> | Rare lipoprotein A                                                         |
| AB0980 | <i>hisB</i> | Imidazoleglycerol-phosphate dehydratase                                    |
| AB0981 |             | HAD-superfamily hydrolase subfamily IIIA:Phosphatase                       |
| AB0982 |             | Hypothetical protein                                                       |
| AB0983 |             | OstA family protein                                                        |
| AB0984 |             | Putative ATP /GTP binding protein                                          |
| AB0985 |             | Acetyltransferase, GNAT Family                                             |
| AB0986 |             | Sigma factor, ECF family                                                   |
| AB0987 |             | Sigma factor regulatory protein, FecR/PupR family                          |
| AB0989 | <i>argC</i> | N-acetyl-gamma-glutamyl-phosphate reductase                                |
| AB0990 |             | Transcriptional regulator, GntR family                                     |
| AB0991 |             | FMN-binding protein                                                        |
| AB0992 |             | Putative antibiotic resistance protein                                     |
| AB0993 |             | AcrB/AcrD/AcrF family protein                                              |
| AB0994 |             | AcrB/AcrD/AcrF family protein                                              |
| AB0995 |             | AcrA/AcrE family protein                                                   |
| AB0996 |             | Outer membrane efflux protein                                              |
| AB0997 |             | Response regulator receiver:Metal-dependent phosphohydrolase, HD subdomain |
| AB0998 | <i>fliP</i> | Flagellar biosynthetic protein FlpP                                        |
| AB0999 | <i>pbpC</i> | Penicillin-binding protein                                                 |
| AB1000 |             | Hypothetical protein                                                       |
| AB1001 |             | Conserved hypothetical protein                                             |
| AB1002 | <i>ftsX</i> | Cell division protein FtsX                                                 |
| AB1011 |             | Conserved hypothetical protein                                             |
| AB1012 |             | Conserved hypothetical protein                                             |
| AB1013 |             | Conserved hypothetical protein                                             |
| AB1014 | <i>rpoD</i> | RNA polymerase sigma 70 factor                                             |
| AB1016 | <i>leuB</i> | 3-isopropylmalate dehydrogenase                                            |
| AB1022 | <i>rpsD</i> | 30S ribosomal protein S4                                                   |
| AB1023 | <i>rpoA</i> | DNA-directed RNA polymerase, alpha chain                                   |
| AB1024 | <i>rplQ</i> | 50S ribosomal protein L17                                                  |
| AB1025 | <i>gatA</i> | Glutamyl-tRNA(Gln) amidotransferase, subunit A                             |

|        |             |                                                                        |
|--------|-------------|------------------------------------------------------------------------|
| AB1026 | <i>guaB</i> | Inosine-5-monophosphate dehydrogenase                                  |
| AB1027 |             | Conserved hypothetical protein                                         |
| AB1028 |             | Hypothetical protein                                                   |
| AB1029 |             | Two-component sensor histidine kinase                                  |
| AB1030 |             | Two-component response regulator                                       |
| AB1031 |             | Outer membrane efflux protein, putative                                |
| AB1032 |             | Conserved hypothetical protein                                         |
| AB1033 |             | Hypothetical membrane protein                                          |
| AB1034 |             | Putative membrane protein                                              |
| AB1035 |             | Peptidase, M50 family                                                  |
| AB1036 |             | DnaJ domain protein                                                    |
| AB1037 |             | DnaJ domain protein                                                    |
| AB1038 |             | Glycosyl hydrolase                                                     |
| AB1042 |             | ABC transporter, ATP-binding protein                                   |
| AB1046 |             | NADP-dependent alcohol dehydrogenase                                   |
| AB1047 |             | Conserved hypothetical protein                                         |
| AB1048 |             | Cyclic nucleotide-binding protein                                      |
| AB1050 |             | Conserved hypothetical protein (DUF24 domain protein)                  |
| AB1051 |             | Conserved hypothetical protein                                         |
| AB1052 |             | Putative sodium:sulfate symporter                                      |
| AB1053 | <i>sugE</i> | Suppresses groEL, may be chaperone                                     |
| AB1057 |             | Transcriptional regulator, LysR family                                 |
| AB1058 |             | Putative integral membrane protein                                     |
| AB1059 |             | Conserved hypothetical periplasmic protein                             |
| AB1060 |             | Auxin efflux carrier protein                                           |
| AB1061 |             | Conserved hypothetical protein (DUF24 domain protein)                  |
| AB1062 |             | Flavodoxin-like fold domain protein, putative NADPH-quinone reductase  |
| AB1063 |             | Conserved hypothetical protein                                         |
| AB1065 |             | Conserved hypothetical integral membrane protein (DUF6 domain protein) |
| AB1066 |             | NAD(P)H-flavin nitroreductase                                          |
| AB1067 |             | Hypothetical protein                                                   |
| AB1068 |             | ABC transporter, ATP-binding protein                                   |
| AB1069 |             | Acyl-CoA thioester hydrolase family protein                            |
| AB1071 | <i>lig</i>  | DNA ligase                                                             |
| AB1072 |             | Glutathionylspermidine synthase family protein                         |
| AB1073 |             | Conserved hypothetical lipoprotein                                     |
| AB1074 | <i>dgt</i>  | Deoxyguanosinetriphosphate triphosphohydrolase                         |
| AB1080 | <i>aroE</i> | Shikimate 5-dehydrogenase                                              |
| AB1081 |             | Methyltransferase, putative                                            |
| AB1082 |             | Conserved hypothetical protein (DUF152 domain protein)                 |
| AB1083 | <i>maeA</i> | NAD-dependent malic enzyme                                             |
| AB1084 | <i>purU</i> | Formyltetrahydrofolate deformylase                                     |
| AB1085 |             | RNA methylase, SpoU family                                             |
| AB1087 |             | Sodium:phosphate cotransporter                                         |
| AB1088 |             | Hypothetical protein                                                   |
| AB1089 |             | Hypothetical protein                                                   |
| AB1090 |             | Two-component response regulator                                       |
| AB1091 |             | Two-component sensor histidine kinase                                  |
| AB1092 |             | Putative protease                                                      |
| AB1093 |             | Conserved hypothetical protein                                         |
| AB1099 |             | Conserved hypothetical protein                                         |
| AB1100 |             | TPR repeat protein, SEL1 subfamily                                     |
| AB1102 | <i>aat</i>  | Leucyl/phenylalanyl-tRNA--protein transferase                          |
| AB1103 | <i>rsuA</i> | Ribosomal small subunit pseudouridine synthase A                       |
| AB1104 |             | HAD-superfamily hydrolase                                              |

|        |              |                                                                               |
|--------|--------------|-------------------------------------------------------------------------------|
| AB1105 |              | Conserved hypothetical protein                                                |
| AB1106 |              | Conserved hypothetical protein                                                |
| AB1109 |              | Putative iron compound ABC transporter, periplasmic substrate-binding protein |
| AB1110 |              | Putative iron compound ABC transporter, ATP-binding protein                   |
| AB1111 |              | Putative iron compound ABC transporter, permease protein                      |
| AB1112 |              | Phosphohistidine phosphatase                                                  |
| AB1113 |              | ABC transporter, ATP-binding protein                                          |
| AB1114 |              | Hypothetical protein                                                          |
| AB1115 |              | Two-component response regulator                                              |
| AB1116 |              | Two-component sensor histidine kinase                                         |
| AB1117 |              | Conserved hypothetical protein                                                |
| AB1118 |              | Hypothetical protein                                                          |
| AB1119 |              | Conserved hypothetical protein                                                |
| AB1120 |              | Hypothetical protein                                                          |
| AB1123 |              | Putative ATP-dependent RNA helicase RhlE                                      |
| AB1126 |              | Hypothetical outer membrane protein                                           |
| AB1127 |              | ABC transporter, transmembrane region                                         |
| AB1128 |              | HlyD family secretion protein                                                 |
| AB1129 |              | Two-component response regulator                                              |
| AB1130 |              | Conserved hypothetical protein                                                |
| AB1131 |              | EAL/GGDEF/HAMP domain protein                                                 |
| AB1132 | <i>aroB</i>  | 3-dehydroquinate synthase                                                     |
| AB1133 |              | Conserved hypothetical integral membrane protein                              |
| AB1134 |              | MiaB-like tRNA modifying enzyme                                               |
| AB1136 |              | Conserved hypothetical protein                                                |
| AB1137 | <i>mog</i>   | Molybdenum cofactor biosynthesis protein Mog                                  |
| AB1139 |              | Conserved hypothetical protein                                                |
| AB1143 |              | Conserved hypothetical protein                                                |
| AB1153 |              | Transcriptional regulator, TetR family                                        |
| AB1154 | <i>mutS2</i> | Mismatch repair ATPase                                                        |
| AB1157 |              | Conserved hypothetical protein (DUF748 domain protein)                        |
| AB1158 | <i>dapE</i>  | Succinyl-diaminopimelate desuccinylase                                        |
| AB1159 | <i>amtB</i>  | Ammonium transporter                                                          |
| AB1160 | <i>glnB2</i> | Nitrogen regulatory protein PII                                               |
| AB1161 | <i>pssA</i>  | CDP-diacylglycerol--serine O-phosphatidyltransferase                          |
| AB1162 |              | Ppx/GppA phosphatase family protein                                           |
| AB1163 |              | Hypothetical protein                                                          |
| AB1164 | <i>ilvI</i>  | Acetolactate synthase, large subunit                                          |
| AB1165 | <i>ilvH</i>  | Acetolactate synthase, small subunit                                          |
| AB1166 | <i>lpxD</i>  | UDP-3-O-[3-hydroxymyristoyl] glucosamine N-acyltransferase                    |
| AB1167 | <i>ftsK</i>  | Cell division protein FtsK                                                    |
| AB1168 |              | Two-component response regulator                                              |
| AB1169 |              | Two-component sensor histidine kinase                                         |
| AB1170 |              | Conserved hypothetical protein                                                |
| AB1183 | <i>engA</i>  | GTP-binding protein                                                           |
| AB1184 |              | Sulfate permease family protein                                               |
| AB1185 | <i>hemD</i>  | Putative uroporphyrinogen III cosynthase HemD                                 |
| AB1186 |              | Hypothetical protein                                                          |
| AB1187 | <i>purD</i>  | Phosphoribosylamine-glycine ligase                                            |
| AB1188 |              | Conserved hypothetical protein                                                |
| AB1189 |              | Conserved hypothetical membrane protein                                       |
| AB1190 |              | Conserved hypothetical protein                                                |
| AB1191 | <i>pnp</i>   | Polyribonucleotide nucleotidyltransferase                                     |
| AB1192 | <i>cheY1</i> | Chemotaxis protein CheY                                                       |
| AB1193 | <i>cheA</i>  | Chemotaxis protein CheA                                                       |

|        |              |                                                                       |
|--------|--------------|-----------------------------------------------------------------------|
| AB1194 | <i>cheR</i>  | Chemotaxis protein methyltransferase                                  |
| AB1195 | <i>cheD</i>  | Chemotaxis protein CheD                                               |
| AB1196 | <i>cheB</i>  | Protein-glutamate methylesterase CheB                                 |
| AB1197 |              | Conserved hypothetical protein                                        |
| AB1198 | <i>fsr</i>   | Fosmidomycin resistance protein                                       |
| AB1199 | <i>xerD</i>  | Integrase/recombinase XerD                                            |
| AB1200 |              | Conserved hypothetical protein                                        |
| AB1201 |              | Hypothetical protein                                                  |
| AB1202 |              | Hypothetical protein                                                  |
| AB1203 | <i>prlC</i>  | Oligopeptidase A                                                      |
| AB1204 | <i>hemK</i>  | Modification methylase                                                |
| AB1205 | <i>hemN1</i> | Oxygen-independent coproporphyrinogen III oxidase                     |
| AB1206 | <i>nudH</i>  | (Di)nucleoside polyphosphate hydrolase                                |
| AB1207 | <i>lysC</i>  | Aspartokinase                                                         |
| AB1208 |              | Conserved hypothetical protein                                        |
| AB1209 | <i>holB</i>  | Putative DNA polymerase III delta prime subunit HolB                  |
| AB1210 | <i>folP</i>  | Dihydropteroate synthase                                              |
| AB1218 | <i>tyrA</i>  | Prephenate dehydrogenase                                              |
| AB1219 |              | Outer membrane surface antigen protein                                |
| AB1220 |              | SAM domain protein                                                    |
| AB1221 |              | Peptidase, M16 family                                                 |
| AB1222 | <i>gltX2</i> | Glutamyl-tRNA synthetase                                              |
| AB1223 |              | Conserved hypothetical membrane protein                               |
| AB1225 | <i>slt</i>   | Soluble lytic murein transglycosylase (slt)                           |
| AB1226 |              | Hypothetical protein                                                  |
| AB1227 | <i>mobB</i>  | Molybdopterin-guanine dinucleotide biosynthesis protein               |
| AB1228 | <i>fbp</i>   | Fructose-1,6-biphosphatase                                            |
| AB1229 |              | Conserved hypothetical protein                                        |
| AB1230 | <i>metS</i>  | Methionyl-tRNA synthetase                                             |
| AB1231 |              | Conserved hypothetical protein                                        |
| AB1232 |              | Peptidase, S24 family                                                 |
| AB1234 |              | Hypothetical protein                                                  |
| AB1235 | <i>pycB2</i> | Pyruvate/oxaloacetate carboxyltransferase                             |
| AB1236 | <i>pckA</i>  | Phosphoenolpyruvate carboxykinase                                     |
| AB1237 | <i>ribAB</i> | GTP cyclohydrolase II / 3,4-dihydroxy-2-butanone 4-phosphate synthase |
| AB1238 | <i>glyS</i>  | Glycyl-tRNA synthetase, beta chain                                    |
| AB1240 |              | Conserved hypothetical protein                                        |
| AB1241 |              | Conserved hypothetical protein                                        |
| AB1242 | <i>gidB</i>  | Glucose inhibited division protein B                                  |
| AB1243 | <i>ribA</i>  | GTP cyclohydrolase II                                                 |
| AB1244 | <i>hemB</i>  | Delta-aminolevulinic acid dehydratase                                 |
| AB1245 |              | Two-component sensor histidine kinase                                 |
| AB1246 |              | Two-component response regulator                                      |
| AB1247 |              | Radical SAM domain protein                                            |
| AB1250 | <i>argF</i>  | Ornithine carbamoyltransferase                                        |
| AB1251 | <i>hemN2</i> | Oxygen-independent coproporphyrinogen III oxidase                     |
| AB1254 | <i>lpxK</i>  | Lipid A biosynthesis protein LpxK                                     |
| AB1255 |              | DegT/DnrJ/EryC1/StrS aminotransferase                                 |
| AB1256 | <i>nadE</i>  | NH(3)-dependent NAD <sup>+</sup> synthetase                           |
| AB1258 |              | Hypothetical protein                                                  |
| AB1259 |              | DnaJ domain protein                                                   |
| AB1261 |              | Conserved hypothetical membrane protein                               |
| AB1262 | <i>tatC</i>  | Sec-independent protein secretion pathway component TatC              |
| AB1263 | <i>queA</i>  | S-adenosylmethionine:tRNA ribosyltransferase-isomerase                |
| AB1264 | <i>dnaQ4</i> | DNA polymerase III, epsilon subunit                                   |

|        |              |                                                                |
|--------|--------------|----------------------------------------------------------------|
| AB1266 | <i>comE</i>  | Competence locus E                                             |
| AB1267 |              | Hypothetical protein                                           |
| AB1268 |              | Conserved hypothetical protein                                 |
| AB1269 |              | Hypothetical protein                                           |
| AB1270 |              | Hypothetical protein                                           |
| AB1271 |              | Conserved hypothetical protein                                 |
| AB1272 | <i>glpC</i>  | Anaerobic glycerol-3-phosphate dehydrogenase, subunit C (glpC) |
| AB1273 | <i>lgt</i>   | Phosphatidylglycerol-prolipoprotein diacylglyceryl transferase |
| AB1274 |              | Hypothetical protein                                           |
| AB1275 |              | Two-component response regulator                               |
| AB1276 | <i>polA</i>  | DNA polymerase I                                               |
| AB1278 | <i>kdsB</i>  | 3-deoxy-manno-octulosonate cytidyltransferase                  |
| AB1279 |              | EAL/GGDEF domain protein                                       |
| AB1280 |              | ABC transporter, ATP-binding protein                           |
| AB1281 |              | Conserved hypothetical protein                                 |
| AB1282 | <i>trpD</i>  | Anthranilate phosphoribosyltransferase                         |
| AB1283 |              | Conserved hypothetical protein                                 |
| AB1284 |              | S4 domain protein                                              |
| AB1285 | <i>argG</i>  | Argininosuccinate synthase                                     |
| AB1286 | <i>dltA</i>  | D-alanine activating enzyme                                    |
| AB1287 | <i>dltB</i>  | D-alanyl transfer protein                                      |
| AB1289 | <i>dltD</i>  | Poly D-alanine transfer protein                                |
| AB1290 | <i>dltC</i>  | D-alanyl carrier protein                                       |
| AB1291 |              | Conserved hypothetical protein                                 |
| AB1295 | <i>ktrA</i>  | TRK system potassium uptake protein TrkA, putative             |
| AB1296 | <i>ktrB</i>  | TRK system potassium uptake protein TrkB, putative             |
| AB1297 | <i>kdpE</i>  | Two component system transcriptional regulatory protein        |
| AB1298 | <i>kdpD</i>  | Two-component regulatory protein sensor kinase KdpD            |
| AB1299 | <i>dut</i>   | Deoxyuridinetriphosphatase                                     |
| AB1300 | <i>recR</i>  | Recombination protein RecR                                     |
| AB1301 | <i>dnaJ</i>  | Co-chaperone and heat shock protein DnaJ                       |
| AB1302 | <i>trpB2</i> | Tryptophan synthase, beta chain                                |
| AB1303 |              | Hypothetical protein                                           |
| AB1304 |              | Hypothetical protein                                           |
| AB1305 |              | Conserved hypothetical protein (DUF455 domain protein)         |
| AB1306 |              | Beta-lactamase-like protein                                    |
| AB1307 |              | GGDEF domain protein                                           |
| AB1308 |              | GGDEF domain protein                                           |
| AB1309 |              | Conserved hypothetical protein                                 |
| AB1311 |              | Cytochrome c biogenesis protein                                |
| AB1312 | <i>pepD</i>  | Aminoacyl-histidine dipeptidase PepD                           |
| AB1313 |              | Hypothetical protein                                           |
| AB1314 |              | Methyl-accepting chemotaxis protein                            |
| AB1315 |              | Hypothetical protein                                           |
| AB1316 | <i>lolA</i>  | Outer membrane lipoprotein carrier protein LolA                |
| AB1317 | <i>secA</i>  | Protein translocase, SecA subunit                              |
| AB1318 |              | Conserved hypothetical integral membrane protein               |
| AB1319 |              | Hypothetical protein                                           |
| AB1320 |              | 4-amino-4-deoxychorismate lyase PabC                           |
| AB1321 | <i>icd</i>   | Isocitrate dehydrogenase                                       |
| AB1323 |              | Conserved hypothetical protein, putative cytochrome c          |
| AB1324 |              | Hypothetical protein                                           |
| AB1325 |              | Conserved hypothetical protein                                 |
| AB1326 |              | Hypothetical protein                                           |
| AB1327 | <i>mraW</i>  | S-adenosyl-methyltransferase                                   |

|        |              |                                                                             |
|--------|--------------|-----------------------------------------------------------------------------|
| AB1359 |              | Conserved hypothetical protein                                              |
| AB1360 | <i>norB</i>  | Nitric oxide reductase, cytochrome b subunit                                |
| AB1361 |              | Hypothetical protein                                                        |
| AB1362 |              | D-amino acid oxidase domain protein                                         |
| AB1363 |              | Conserved hypothetical protein                                              |
| AB1364 |              | Response regulator receiver domain protein, CheY-like                       |
| AB1366 |              | Two-component sensor histidine kinase                                       |
| AB1367 | <i>cbpA</i>  | Curved DNA-binding protein CbpA                                             |
| AB1368 |              | Transcriptional regulator (MerR family), putative heat shock regulator HspR |
| AB1369 |              | HlyD-family secretion protein                                               |
| AB1370 |              | ABC transporter, ATP-binding protein                                        |
| AB1371 |              | ABC transporter, permease protein                                           |
| AB1372 |              | ABC transporter, permease protein                                           |
| AB1373 |              | Conserved hypothetical protein (DUF475 domain protein)                      |
| AB1374 | <i>brnQ</i>  | Branched-chain amino acid transport system II carrier protein               |
| AB1376 |              | Conserved hypothetical protein                                              |
| AB1377 |              | Conserved hypothetical protein                                              |
| AB1379 |              | Polysaccharide deacetylase                                                  |
| AB1380 | <i>nhaA1</i> | Sodium:hydrogen antiporter                                                  |
| AB1381 |              | Hypothetical protein                                                        |
| AB1382 | <i>metX</i>  | Homoserine O-acetyltransferase                                              |
| AB1384 |              | Hypothetical protein                                                        |
| AB1385 | <i>ftsZ</i>  | Cell division protein FtsZ                                                  |
| AB1386 | <i>ftsA</i>  | Cell division protein FtsA                                                  |
| AB1387 |              | Conserved hypothetical membrane protein                                     |
| AB1388 | <i>recD</i>  | Exodeoxyribonuclease V, alpha subunit                                       |
| AB1389 |              | Conserved hypothetical protein                                              |
| AB1392 |              | Hypothetical protein                                                        |
| AB1393 |              | Conserved hypothetical protein                                              |
| AB1394 |              | Conserved hypothetical protein                                              |
| AB1395 |              | Conserved hypothetical membrane protein                                     |
| AB1398 |              | Conserved hypothetical protein (DUF1706 domain protein)                     |
| AB1399 | <i>dapD</i>  | 2,3,4,5-tetrahydropyridine-2-carboxylate N-succinyltransferase DapD         |
| AB1400 |              | HAD-superfamily hydrolase                                                   |
| AB1401 |              | Hypothetical protein                                                        |
| AB1403 | <i>priA</i>  | Primosomal protein N'                                                       |
| AB1404 |              | Hypothetical protein                                                        |
| AB1405 |              | Hypothetical protein                                                        |
| AB1407 |              | Hypothetical protein                                                        |
| AB1408 | <i>hypA</i>  | Hydrogenase expression/formation protein HypA                               |
| AB1409 | <i>hypE</i>  | Hydrogenase expression/formation protein HypE                               |
| AB1410 |              | Conserved hypothetical protein                                              |
| AB1411 |              | 3-hydroxyisobutyrate dehydrogenase family protein                           |
| AB1412 |              | McrBC endonuclease McrB, putative                                           |
| AB1415 | <i>hypC</i>  | Hydrogenase expression/formation protein HypC                               |
| AB1416 | <i>hypB</i>  | Hydrogenase expression/formation protein HypB                               |
| AB1417 |              | Conserved hypothetical protein                                              |
| AB1421 |              | Conserved hypothetical membrane protein (DUF808)                            |
| AB1422 |              | Hypothetical protein                                                        |
| AB1423 |              | Conserved hypothetical protein                                              |
| AB1424 |              | Conserved hypothetical membrane protein (DUF481)                            |
| AB1425 |              | Conserved hypothetical protein                                              |
| AB1427 | <i>thil</i>  | Thiamine biosynthesis protein Thil                                          |
| AB1428 |              | Hypothetical protein                                                        |
| AB1429 |              | Hypothetical protein                                                        |

|        |              |                                                               |
|--------|--------------|---------------------------------------------------------------|
| AB1430 |              | Conserved hypothetical protein (DUF1504 domain protein)       |
| AB1431 | <i>hypF</i>  | Transcriptional regulatory protein HypF                       |
| AB1432 |              | Conserved hypothetical protein                                |
| AB1433 | <i>hydD</i>  | Ni/Fe hydrogenase, expression/formation protein               |
| AB1434 | <i>hydC</i>  | Ni/Fe hydrogenase, cytochrome b subunit                       |
| AB1435 | <i>hydB</i>  | Ni/Fe-hydrogenase, large subunit                              |
| AB1438 |              | Sigma factor, ECF family                                      |
| AB1439 |              | Conserved hypothetical protein                                |
| AB1440 | <i>hyaD</i>  | Ni/Fe hydrogenase, expression/formation protein               |
| AB1441 | <i>hyaC</i>  | Ni/Fe hydrogenase, cytochrome b subunit                       |
| AB1442 | <i>hyaB</i>  | Ni/Fe-hydrogenase, large subunit                              |
| AB1443 | <i>hyaA</i>  | Ni/Fe-hydrogenase, small subunit                              |
| AB1444 | <i>hupL</i>  | Ni/Fe-dependent hydrogenase, large subunit                    |
| AB1445 | <i>hupS</i>  | Ni/Fe-dependent hydrogenase, small subunit                    |
| AB1446 |              | Transcriptional regulator, TetR family                        |
| AB1447 | <i>acnB</i>  | Aconitate hydratase 2                                         |
| AB1449 |              | GGDEF/PAS domain protein                                      |
| AB1450 |              | Conserved hypothetical protein (DUF28 domain protein)         |
| AB1451 |              | VacJ-like lipoprotein                                         |
| AB1452 |              | Putative periplasmic protein                                  |
| AB1453 |              | Conserved hypothetical integral membrane protein              |
| AB1454 |              | Lysine decarboxylase-like protein                             |
| AB1455 |              | HAD-superfamily hydrolase                                     |
| AB1456 |              | Putative lipoprotein thioredoxin                              |
| AB1457 | <i>dsbA</i>  | DsbA-like thioredoxin domain protein                          |
| AB1458 | <i>dsbB</i>  | Disulfide bond formation protein, DsbB family                 |
| AB1459 |              | Glycosyltransferase                                           |
| AB1463 |              | GGDEF domain protein                                          |
| AB1464 |              | Conserved hypothetical protein (DUF125 domain protein)        |
| AB1466 | <i>kefB</i>  | Glutathione-regulated potassium-efflux system protein KefB    |
| AB1467 |              | Conserved hypothetical protein                                |
| AB1468 | <i>glyA2</i> | Serine hydroxymethyltransferase                               |
| AB1469 | <i>ada</i>   | O6-methylguanine-DNA methyltransferase                        |
| AB1470 |              | Endonuclease III                                              |
| AB1471 |              | Ribonuclease H-like protein                                   |
| AB1474 |              | Pyridoxamine 5'-phosphate oxidase-related, FMN-binding        |
| AB1476 | <i>argD2</i> | N-acetylornithine aminotransferase                            |
| AB1477 |              | Conserved hypothetical protein                                |
| AB1478 | <i>lipA</i>  | Lipoic acid synthetase                                        |
| AB1480 | <i>aceE</i>  | Pyruvate dehydrogenase E1 component                           |
| AB1481 | <i>aceF</i>  | Dihydrolipoamide acetyltransferase                            |
| AB1482 | <i>lpdA</i>  | Dihydrolipoamide dehydrogenase                                |
| AB1483 |              | Glutamine amidotransferase, class I                           |
| AB1485 |              | Aldose 1-epimerase family protein, LacX                       |
| AB1487 | <i>rhIE</i>  | ATP-dependent RNA helicase RhIE                               |
| AB1494 |              | Conserved hypothetical protein (DUF302 domain protein)        |
| AB1495 |              | Conserved hypothetical protein                                |
| AB1497 | <i>rnhA</i>  | Ribonuclease HI                                               |
| AB1498 |              | HMGL family protein                                           |
| AB1499 |              | Conserved hypothetical protein                                |
| AB1500 |              | Conserved hypothetical protein                                |
| AB1501 | <i>dinP</i>  | DNA polymerase IV                                             |
| AB1502 | <i>moeA1</i> | Molybdenum cofactor biosynthesis protein A                    |
| AB1503 |              | Cysteine desulfurase, NifS homolog                            |
| AB1504 | <i>fdhD</i>  | FdhD/NarQ protein required for formate dehydrogenase activity |

|        |              |                                                                       |
|--------|--------------|-----------------------------------------------------------------------|
| AB1505 | <i>fdhC</i>  | Putative FdhC protein                                                 |
| AB1506 | <i>fdhB1</i> | Formate dehydrogenase, iron-sulfur subunit FdhB                       |
| AB1507 | <i>fdhA1</i> | Formate dehydrogenase, large subunit FdhA (Selenocysteine containing) |
| AB1509 |              | Conserved hypothetical protein                                        |
| AB1510 |              | Conserved hypothetical protein                                        |
| AB1511 |              | 4Fe-4S ferredoxin, iron-sulfur binding                                |
| AB1512 | <i>livJ</i>  | Leucine/isoleucine/valine-binding protein                             |
| AB1513 |              | Two-component sensor histidine kinase                                 |
| AB1514 |              | Two-component response regulator                                      |
| AB1515 |              | Mn2+ and Fe2+ transporter, NRAMP family                               |
| AB1516 |              | Heavy-metal transporting ATPase                                       |
| AB1517 |              | Heavy-metal transport protein, MerT homolog                           |
| AB1518 |              | Transglutaminase family protein                                       |
| AB1519 |              | Putative FdhC protein                                                 |
| AB1520 | <i>fdhB2</i> | Formate dehydrogenase, iron-sulfur subunit FdhB                       |
| AB1521 | <i>fdhA2</i> | Formate dehydrogenase, large subunit FdhA (Cysteine containing)       |
| AB1522 |              | Formate dehydrogenase subunit E, putative                             |
| AB1523 | <i>selD</i>  | Selenide, water dikinase                                              |
| AB1533 | <i>selA</i>  | L-seryl-tRNA selenium transferase                                     |
| AB1534 | <i>selB</i>  | Selenocysteine-specific elongation factor                             |
| AB1535 |              | Putative DNA helicase                                                 |
| AB1536 |              | Conserved hypothetical protein                                        |
| AB1537 |              | Hypothetical protein                                                  |
| AB1540 |              | Conserved hypothetical protein                                        |
| AB1541 |              | Two-component sensor histidine kinase                                 |
| AB1542 |              | Putative FMN reductase                                                |
| AB1543 |              | PhoH family protein                                                   |
| AB1546 | <i>pdxH</i>  | Pyridoxamine 5'-phosphate oxidase                                     |
| AB1547 |              | GGDEF/PAS domain protein                                              |
| AB1548 | <i>dbpA</i>  | ATP-dependent RNA helicase DbpA                                       |
| AB1549 |              | Conserved hypothetical integral membrane protein                      |
| AB1550 |              | Conserved hypothetical protein                                        |
| AB1551 |              | Hypothetical protein                                                  |
| AB1552 | <i>htpG</i>  | Heat shock protein 90 HtpG                                            |
| AB1555 | <i>ciaB</i>  | CiaB protein                                                          |
| AB1557 |              | Ankyrin repeat protein                                                |
| AB1558 | <i>pqiB</i>  | Paraquat-inducible protein B                                          |
| AB1561 |              | Protozoan/cyanobacterial globin homolog                               |
| AB1562 |              | EAL/GGDEF domain protein                                              |
| AB1563 |              | Hypothetical protein                                                  |
| AB1564 |              | Putative integral membrane protein (DUF6 domain protein)              |
| AB1565 |              | Conserved hypothetical membrane protein (DUF6)                        |
| AB1566 |              | Conserved hypothetical protein                                        |
| AB1567 |              | Putative DNA alkylation repair enzyme                                 |
| AB1570 |              | Transcriptional regulator, ThiJ/Pfpl family                           |
| AB1572 |              | Conserved hypothetical protein                                        |
| AB1578 | <i>speB</i>  | Arginase/agmatinase/formiminoglutamate hydrolase, arginase family     |
| AB1580 |              | Transcriptional regulator, AraC family                                |
| AB1585 | <i>sodB</i>  | Superoxide dismutase                                                  |
| AB1586 |              | Conserved hypothetical membrane protein                               |
| AB1587 | <i>ppa</i>   | Inorganic pyrophosphatase, manganese-dependent                        |
| AB1588 |              | Conserved hypothetical protein (DUF1121 domain protein)               |
| AB1589 |              | Conserved hypothetical protein, putative asparaginase                 |
| AB1590 | <i>aspA</i>  | Aspartate ammonia-lyase                                               |
| AB1594 | <i>pfs</i>   | 5'-methylthioadenosine/S-adenosylhomocysteine nucleosidase            |

|        |              |                                                                                |
|--------|--------------|--------------------------------------------------------------------------------|
| AB1595 | <i>fabD</i>  | Malonyl coenzyme A-(acyl carrier protein) transacylase                         |
| AB1596 | <i>slyD</i>  | Peptidyl-prolyl cis-trans isomerase                                            |
| AB1597 |              | Conserved hypothetical protein                                                 |
| AB1598 |              | OmpA/MotB precursor                                                            |
| AB1599 | <i>tolB</i>  | Colicin tolerance-like protein (tolB)                                          |
| AB1600 |              | Conserved hypothetical protein                                                 |
| AB1601 | <i>exbD3</i> | Biopolymer transport protein ExbD                                              |
| AB1602 | <i>exbB3</i> | Biopolymer transport protein ExbB                                              |
| AB1603 | <i>atpC</i>  | ATP synthase F1 sector, epsilon subunit                                        |
| AB1605 | <i>atpD</i>  | ATP synthase F1 sector, beta subunit                                           |
| AB1606 | <i>atpG</i>  | ATP synthase F1 sector, gamma subunit                                          |
| AB1607 | <i>atpA</i>  | ATP synthase F1 sector, alpha subunit                                          |
| AB1608 | <i>atpH</i>  | ATP synthase F1 sector, delta subunit                                          |
| AB1609 | <i>atpF</i>  | ATP synthase F0 sector, subunit B                                              |
| AB1610 | <i>atpF'</i> | ATP synthase F0 sector, B' subunit                                             |
| AB1611 | <i>parB</i>  | Transcriptional regulator involved in chromosome partitioning ParB             |
| AB1612 | <i>parA</i>  | ATPases involved in chromosome partitioning ParA                               |
| AB1613 | <i>birA</i>  | Biotin--acetyl-CoA-carboxylase ligase                                          |
| AB1615 |              | Auxin efflux carrier protein                                                   |
| AB1616 | <i>fmt</i>   | 10-formyltetrahydrofolate:L-methionyl-tRNA(fMet) N-formyltransferase           |
| AB1617 | <i>proB</i>  | Glutamate 5-kinase                                                             |
| AB1618 | <i>obg</i>   | GTP-binding protein                                                            |
| AB1619 | <i>rpmA</i>  | 50S ribosomal protein L27                                                      |
| AB1620 | <i>rplU</i>  | 50S ribosomal protein L21                                                      |
| AB1621 | <i>dnaG</i>  | DNA primase                                                                    |
| AB1622 |              | Conserved hypothetical protein                                                 |
| AB1623 | <i>rnc</i>   | Ribonuclease III                                                               |
| AB1624 | <i>aroC</i>  | Chorismate synthase                                                            |
| AB1626 |              | Peptidase, M48 family                                                          |
| AB1627 |              | Conserved hypothetical protein                                                 |
| AB1628 |              | Phosphoglycerate/bisphosphoglycerate mutase, putative                          |
| AB1629 |              | Hypothetical protein                                                           |
| AB1630 | <i>trmE</i>  | tRNA modification GTPase                                                       |
| AB1631 |              | Conserved hypothetical protein                                                 |
| AB1632 | <i>oxaA</i>  | Inner membrane protein, 60 kDa                                                 |
| AB1633 |              | Conserved hypothetical protein (DUF37 domain protein)                          |
| AB1635 | <i>clpB</i>  | ATP-dependent Clp protease, ATP-binding subunit                                |
| AB1636 | <i>rnhB</i>  | Ribonuclease HII                                                               |
| AB1637 |              | Hypothetical protein (DUF77 domain protein)                                    |
| AB1638 |              | Conserved hypothetical protein (DUF344 domain protein)                         |
| AB1639 |              | Conserved hypothetical protein                                                 |
| AB1640 | <i>msrA</i>  | Peptide methionine sulfoxide reductase                                         |
| AB1641 | <i>msrB</i>  | Peptide methionine sulfoxide reductase                                         |
| AB1642 |              | Fumarylacetoacetate (FAA) hydrolase                                            |
| AB1643 |              | Conserved hypothetical protein (DUF1291 domain protein)                        |
| AB1644 |              | Phosphohydrolase (MUTT/NUDIX family protein)                                   |
| AB1645 | <i>bioA</i>  | 7,8-diaminopelargonic acid synthetase                                          |
| AB1646 |              | Two-component sensor histidine kinase                                          |
| AB1647 | <i>purH</i>  | Phosphoribosylaminoimidazolecarboxamide formyltransferase / IMP cyclohydrolase |
| AB1648 | <i>purL</i>  | Phosphoribosylformylglycinamide synthase II                                    |
| AB1649 |              | Conserved hypothetical protein                                                 |
| AB1650 |              | Peptidase, M23/M37 family                                                      |
| AB1651 | <i>folE</i>  | GTP cyclohydrolase I                                                           |
| AB1652 | <i>corA</i>  | Magnesium and cobalt transport protein                                         |
| AB1653 | <i>ctsF</i>  | Campylobacter transformation system protein CtsF                               |

|        |              |                                                                      |
|--------|--------------|----------------------------------------------------------------------|
| AB1654 | <i>ctsE</i>  | Campylobacter transformation system protein CtsE                     |
| AB1707 |              | Hypothetical protein                                                 |
| AB1708 |              | Hypothetical protein                                                 |
| AB1709 | <i>era</i>   | GTP-binding protein Era homolog                                      |
| AB1711 |              | Mg chelatase-related protein                                         |
| AB1712 |              | Hypothetical protein                                                 |
| AB1713 | <i>def</i>   | Polypeptide deformylase                                              |
| AB1714 | <i>clpP</i>  | ATP-dependent Clp protease, proteolytic subunit                      |
| AB1715 | <i>tig</i>   | Trigger factor                                                       |
| AB1716 |              | Conserved hypothetical protein                                       |
| AB1718 |              | Conserved hypothetical protein                                       |
| AB1719 | <i>nspC</i>  | Carboxynorspermidine decarboxylase                                   |
| AB1720 |              | Saccharopine dehydrogenase (L-lysine-forming)                        |
| AB1737 | <i>metC1</i> | Cystathionine gamma-synthase                                         |
| AB1738 | <i>metC2</i> | Cystathionine gamma-synthase                                         |
| AB1745 |              | Auxin efflux carrier protein                                         |
| AB1746 |              | Hypothetical protein                                                 |
| AB1747 |              | Hypothetical protein                                                 |
| AB1748 |              | Hypothetical protein                                                 |
| AB1749 |              | Conserved hypothetical protein, putative cytochrome                  |
| AB1750 |              | Two-component response regulator                                     |
| AB1751 |              | Acetyltransferase, GNAT family                                       |
| AB1752 |              | Putative nickel transporter                                          |
| AB1753 |              | Putative cation ABC transporter, periplasmic-binding protein         |
| AB1754 |              | Transcriptional regulator, Fur family                                |
| AB1755 | <i>nhaA2</i> | Sodium:hydrogen antiporter                                           |
| AB1756 |              | Diheme cytochrome c peroxidase                                       |
| AB1757 |              | Sterol desaturase-related protein                                    |
| AB1758 |              | Hypothetical protein                                                 |
| AB1759 |              | Conserved hypothetical protein (DUF1111 domain protein)              |
| AB1760 |              | Conserved hypothetical protein                                       |
| AB1761 |              | Conserved hypothetical protein                                       |
| AB1763 | <i>atpE</i>  | ATP synthase F0 sector, C subunit                                    |
| AB1767 |              | Hypothetical protein                                                 |
| AB1768 |              | Hypothetical protein                                                 |
| AB1769 |              | Conserved hypothetical protein                                       |
| AB1770 | <i>thiD</i>  | Phosphomethylpyrimidine kinase                                       |
| AB1771 | <i>proA</i>  | Gamma-glutamyl phosphate reductase                                   |
| AB1772 |              | Glycosyl hydrolase, putative                                         |
| AB1773 |              | Hypothetical protein                                                 |
| AB1774 |              | Ferredoxin-like protein                                              |
| AB1775 |              | Two-component sensor histidine kinase                                |
| AB1776 |              | Two-component response regulator                                     |
| AB1777 | <i>ogt</i>   | Putative methylated-DNA-protein-cysteine methyltransferase           |
| AB1778 |              | Phosphohexosemutase                                                  |
| AB1779 |              | Conserved hypothetical protein, putative nitrilase/cyanide hydratase |
| AB1780 |              | Conserved hypothetical protein                                       |
| AB1781 |              | Conserved hypothetical protein                                       |
| AB1782 |              | Conserved hypothetical protein                                       |
| AB1783 | <i>fldA</i>  | Flavodoxin                                                           |
| AB1784 | <i>fur2</i>  | Ferric uptake regulation protein                                     |
| AB1785 |              | Hypothetical protein                                                 |
| AB1786 | <i>ate</i>   | Putative arginyl-tRNA--protein transferase                           |
| AB1787 | <i>trpA</i>  | Tryptophan synthase, alpha chain                                     |
| AB1789 | <i>panB</i>  | 3-methyl-2-oxobutanoate hydroxymethyltransferase                     |

|        |              |                                                                                                |
|--------|--------------|------------------------------------------------------------------------------------------------|
| AB1790 | <i>ruvB</i>  | Holliday junction DNA helicase RuvB                                                            |
| AB1807 | <i>waaE</i>  | ADP-heptose synthase                                                                           |
| AB1808 | <i>gmhA</i>  | D-sedoheptulose 7-phosphate isomerase                                                          |
| AB1809 |              | Putative sulfatase                                                                             |
| AB1810 | <i>waaF</i>  | Lipopolysaccharide heptosyltransferase II                                                      |
| AB1811 |              | Conserved hypothetical protein                                                                 |
| AB1812 |              | Putative heptosyltransferase                                                                   |
| AB1813 |              | Conserved hypothetical protein                                                                 |
| AB1814 |              | Conserved hypothetical membrane protein                                                        |
| AB1817 |              | Putative acetyltransferase                                                                     |
| AB1818 |              | Putative glycosyltransferase                                                                   |
| AB1819 |              | Putative glycosyltransferase                                                                   |
| AB1820 |              | Conserved hypothetical protein                                                                 |
| AB1821 |              | Probable glycosyltransferase                                                                   |
| AB1822 |              | Conserved hypothetical protein                                                                 |
| AB1823 |              | Glycosyltransferase                                                                            |
| AB1824 |              | Putative O-antigen polymerase                                                                  |
| AB1825 |              | Aminotransferase, DegT/DnrJ/EryC1/StrS family                                                  |
| AB1826 |              | dTDP-glucose 4,6-dehydratase                                                                   |
| AB1827 |              | Glucose-1-phosphate thymidyltransferase                                                        |
| AB1829 |              | Phosphoglycerol transferase                                                                    |
| AB1830 | <i>dgkA</i>  | Diacylglycerol kinase                                                                          |
| AB1831 |              | Conserved hypothetical protein                                                                 |
| AB1832 | <i>waaM</i>  | Lipid A biosynthesis lauroyl acyltransferase                                                   |
| AB1833 | <i>waaC</i>  | Lipopolysaccharide heptosyltransferase I                                                       |
| AB1834 | <i>gppA</i>  | Guanosine pentaphosphate phosphohydrolase (gppA)                                               |
| AB1835 | <i>fdxB</i>  | Ferredoxin                                                                                     |
| AB1836 |              | Inositol monophosphatase family protein                                                        |
| AB1837 | <i>gltD</i>  | Glutamate synthase, small chain                                                                |
| AB1842 |              | Methyl-accepting chemotaxis protein                                                            |
| AB1844 | <i>gspD</i>  | General secretion pathway protein D                                                            |
| AB1845 |              | Conserved hypothetical protein                                                                 |
| AB1846 | <i>tlyA</i>  | Hemolysin A                                                                                    |
| AB1847 | <i>ribF</i>  | Riboflavin kinase/FAD synthase RibF                                                            |
| AB1848 |              | Methyltransferase, putative                                                                    |
| AB1849 | <i>bcp</i>   | Bacterioferritin comigratory protein, alkyl hydroperoxide reductase/thiol specific antioxidant |
| AB1850 |              | Hypothetical protein                                                                           |
| AB1851 | <i>glcD</i>  | Glycolate oxidase                                                                              |
| AB1852 | <i>rbn</i>   | tRNA-processing ribonuclease BN                                                                |
| AB1854 | <i>murA</i>  | UDP-N-acetylglucosamine 1-carboxyvinyltransferase                                              |
| AB1855 |              | Conserved hypothetical membrane protein (DUF6)                                                 |
| AB1856 | <i>kdsA</i>  | 3-deoxy-D-manno-octulosonic acid 8-phosphate synthase                                          |
| AB1857 | <i>ribH</i>  | Riboflavin synthase, beta subunit                                                              |
| AB1858 | <i>nusB</i>  | Transcription termination factor NusB                                                          |
| AB1859 | <i>pyrF</i>  | Orotidine 5'-phosphate decarboxylase                                                           |
| AB1860 |              | ABC transporter, ATP-binding protein                                                           |
| AB1861 |              | Hypothetical protein                                                                           |
| AB1862 | <i>feoA</i>  | Ferrous iron transport protein A                                                               |
| AB1863 | <i>feoB2</i> | Ferrous iron transport protein B                                                               |
| AB1864 |              | Conserved hypothetical protein                                                                 |
| AB1865 |              | Conserved hypothetical protein                                                                 |
| AB1866 |              | Conserved hypothetical protein                                                                 |
| AB1867 |              | Conserved hypothetical protein                                                                 |
| AB1868 |              | Heavy metal-(Cd/Co/Hg/Pb/Zn)-translocating P-type ATPase                                       |
| AB1869 |              | Transcriptional regulator, ArsR family                                                         |

|        |             |                                                                                     |
|--------|-------------|-------------------------------------------------------------------------------------|
| AB1875 | <i>cspA</i> | Cold-shock protein, DNA-binding                                                     |
| AB1877 |             | Two-component response regulator                                                    |
| AB1878 |             | Two-component sensor histidine kinase                                               |
| AB1883 | <i>ahpC</i> | Alkyl hydroperoxide reductase/ Thiol specific antioxidant                           |
| AB1885 |             | Conserved hypothetical protein                                                      |
| AB1886 |             | Hypothetical protein                                                                |
| AB1887 | <i>rpoC</i> | DNA-directed RNA polymerase, beta' chain                                            |
| AB1888 | <i>rpoB</i> | DNA-directed RNA polymerase, beta chain                                             |
| AB1889 | <i>rplL</i> | 50S ribosomal protein L7/L12                                                        |
| AB1890 | <i>rplJ</i> | 50S ribosomal protein L10                                                           |
| AB1891 | <i>rplA</i> | 50S ribosomal protein L1                                                            |
| AB1892 | <i>rplK</i> | 50S ribosomal protein L11                                                           |
| AB1893 | <i>nusG</i> | Transcription termination factor NusG                                               |
| AB1895 | <i>rpmG</i> | 50S ribosomal protein L33                                                           |
| AB1896 | <i>tufA</i> | Elongation factor Tu                                                                |
| AB1897 | <i>murD</i> | UDP-N-acetylmuramoylalanine--D-glutamate ligase                                     |
| AB1898 | <i>mraY</i> | Phospho-N-acetylmuramoyl-pentapeptide transferase                                   |
| AB1899 | <i>pgm</i>  | Phosphoglycerate mutase, 2,3-bisphosphoglycerate-independent                        |
| AB1900 |             | ABC transporter, ATP-binding protein                                                |
| AB1901 | <i>pbpA</i> | Penicillin-binding protein 1A                                                       |
| AB1902 | <i>glnA</i> | Glutamine synthetase                                                                |
| AB1903 | <i>hisJ</i> | Histidinol-phosphate phosphatase                                                    |
| AB1904 | <i>moaE</i> | Molybdopterin converting factor, subunit 2                                          |
| AB1905 | <i>moaD</i> | Molybdopterin converting factor, subunit 1                                          |
| AB1906 |             | Conserved hypothetical protein (DUF178 domain protein)                              |
| AB1907 | <i>uppP</i> | Undecaprenyl diphosphatase, putative                                                |
| AB1908 | <i>murG</i> | UDP-N-acetylglucosamine--N-acetylmuramyl-(pentapeptide) pyrophosphoryl-undecaprenol |
|        |             | N-acetylglucosamine transferase                                                     |
| AB1909 | <i>pbpB</i> | Penicillin-binding protein                                                          |
| AB1910 | <i>ftsW</i> | Cell division protein FtsW                                                          |
| AB1911 | <i>ppi</i>  | Peptidyl-prolyl cis-trans isomerase                                                 |
| AB1912 |             | Cytochrome c                                                                        |
| AB1913 | <i>clpA</i> | ATP-dependent Clp protease, ATP-binding subunit                                     |
| AB1914 | <i>clpS</i> | ATP-dependent Clp protease adaptor protein ClpS                                     |
| AB1915 | <i>bioD</i> | Dethiobiotin synthetase                                                             |
| AB1917 |             | CitE domain protein                                                                 |
| AB1918 |             | AMP-dependent synthetase and ligase/CitE domain protein                             |
| AB1919 |             | MaoC family protein, putative enoyl-CoA hydratase                                   |
| AB1920 |             | CitE domain protein                                                                 |
| AB1921 | <i>fumA</i> | Fumarate hydratase, class I                                                         |
| AB1922 |             | Conserved hypothetical protein                                                      |
| AB1923 |             | Methyl-accepting chemotaxis protein                                                 |
| AB1924 | <i>arsB</i> | Arsenical pump membrane protein                                                     |
| AB1925 | <i>arsR</i> | Transcriptional regulator, ArsR family                                              |
| AB1926 |             | Putative redox-active disulfide protein                                             |
| AB1928 | <i>arsC</i> | Arsenate reductase                                                                  |
| AB1929 |             | Conserved hypothetical protein                                                      |
| AB1930 |             | Putative integral membrane protein                                                  |
| AB1931 | <i>flhA</i> | Flagellar biosynthesis protein FlhA                                                 |
| AB1933 | <i>flil</i> | Flagellum-specific ATP synthase Flil                                                |
| AB1934 |             | Tetratricopeptide repeat domain protein                                             |
| AB1935 | <i>flhB</i> | Flagellar biosynthetic protein FlhB                                                 |
| AB1936 | <i>fliR</i> | Flagellar biosynthetic protein FliR                                                 |
| AB1937 |             | Hypothetical membrane protein                                                       |
| AB1938 | <i>flgC</i> | Flagellar basal body rod protein FlgC                                               |

|        |              |                                                                        |
|--------|--------------|------------------------------------------------------------------------|
| AB1939 | <i>fliE</i>  | Flagellar hook-basal body protein FliE                                 |
| AB1940 |              | Hypothetical protein                                                   |
| AB1941 |              | ATP-binding protein                                                    |
| AB1942 | <i>flhF</i>  | Flagellar biosynthesis (GTP-binding) protein FlhF                      |
| AB1943 |              | Hypothetical protein                                                   |
| AB1944 |              | Hypothetical protein                                                   |
| AB1945 |              | Hypothetical protein                                                   |
| AB1946 | <i>fliY</i>  | Flagellar motor switch protein FliY                                    |
| AB1947 | <i>flaG</i>  | Polar flagellin                                                        |
| AB1948 |              | TPR repeat protein                                                     |
| AB1949 |              | Hypothetical protein                                                   |
| AB1953 | <i>fliN</i>  | Flagellar motor switch protein FliN                                    |
| AB1954 | <i>fliH</i>  | Flagellar assembly protein FliH                                        |
| AB1955 | <i>fliG</i>  | Flagellar motor switch protein FliG                                    |
| AB1956 | <i>fliF</i>  | Flagellar M-ring protein FliF                                          |
| AB1957 | <i>flgB</i>  | Flagellar basal body rod protein FlgB                                  |
| AB1958 | <i>flgG1</i> | Flagellar distal rod protein FlgG                                      |
| AB1959 |              | Conserved hypothetical protein                                         |
| AB1960 | <i>cheY2</i> | Chemotaxis protein CheY                                                |
| AB1961 | <i>flgG2</i> | Flagellar distal rod protein FlgG                                      |
| AB1962 |              | Hypothetical protein                                                   |
| AB1964 | <i>rimM</i>  | 16S rRNA processing protein                                            |
| AB1965 |              | Conserved hypothetical protein                                         |
| AB1966 | <i>rpsP</i>  | 30S ribosomal protein S16                                              |
| AB1967 | <i>ffh</i>   | Signal recognition particle protein                                    |
| AB1968 |              | Ribosomal large subunit pseudouridine synthase                         |
| AB1969 | <i>kdtA</i>  | 3-deoxy-D-manno-octulosonic-acid transferase                           |
| AB1970 |              | Conserved hypothetical protein (DUF164 domain protein)                 |
| AB1971 |              | Conserved hypothetical protein                                         |
| AB1972 | <i>glyQ</i>  | Glycyl-tRNA synthetase, alpha chain                                    |
| AB1973 |              | Glutaredoxin-like protein                                              |
| AB1974 | <i>purE</i>  | Phosphoribosylaminoimidazole carboxylase, catalytic subunit            |
| AB1975 |              | Hypothetical protein                                                   |
| AB1976 |              | Peptidase, U32 family                                                  |
| AB1977 |              | Methyl-accepting chemotaxis protein                                    |
| AB1978 | <i>recN</i>  | DNA repair protein RecN                                                |
| AB1979 |              | NAD(+) kinase                                                          |
| AB1980 | <i>fus</i>   | Translational elongation factor G                                      |
| AB1982 | <i>rpsL</i>  | 30S ribosomal protein S12                                              |
| AB1983 |              | Alpha/beta hydrolase                                                   |
| AB1984 | <i>araJ</i>  | Putative transport protein AraJ                                        |
| AB1985 |              | TonB-dependent receptor protein                                        |
| AB1986 |              | Putative sulfonate/nitrate transport system substrate-binding protein  |
| AB1987 |              | Nitrite/nitric oxide reductase-related protein NnrS                    |
| AB1988 |              | ABC transporter, ATP-binding protein                                   |
| AB1989 |              | ABC transporter, permease protein                                      |
| AB1990 |              | Conserved hypothetical protein                                         |
| AB1991 |              | Conserved hypothetical membrane protein                                |
| AB1992 | <i>trpG</i>  | Anthranilate synthase, component II                                    |
| AB1993 | <i>fbpA</i>  | Putative iron-uptake ABC transporter, periplasmic iron-binding protein |
| AB1994 | <i>fbpB</i>  | Putative iron-uptake ABC transporter, permease protein                 |
| AB1996 |              | ABC transporter, ATP-binding protein                                   |
| AB1997 |              | Transcriptional regulator, AraC family                                 |
| AB2000 |              | Conserved hypothetical protein                                         |
| AB2001 |              | Conserved hypothetical protein                                         |

|        |             |                                                                       |
|--------|-------------|-----------------------------------------------------------------------|
| AB2002 | <i>nirA</i> | Ferredoxin-nitrite reductase                                          |
| AB2003 |             | Conserved hypothetical protein                                        |
| AB2004 |             | Hypothetical protein                                                  |
| AB2005 |             | Conserved hypothetical protein                                        |
| AB2006 |             | S1 RNA binding domain protein                                         |
| AB2007 |             | Conserved hypothetical protein                                        |
| AB2008 |             | Conserved hypothetical protein                                        |
| AB2009 |             | MutT/nudix family protein                                             |
| AB2010 |             | Transcriptional regulator, AraC family                                |
| AB2011 |             | Aminotransferase, classes I and II                                    |
| AB2014 | <i>rplS</i> | 50S ribosomal protein L19                                             |
| AB2015 | <i>trmD</i> | tRNA (guanine-N1)-methyltransferase                                   |
| AB2016 |             | Hypothetical protein                                                  |
| AB2017 | <i>metE</i> | 5-methyltetrahydropteroyltriglutamate--homocysteine methyltransferase |
| AB2018 | <i>ilvA</i> | Threonine deaminase                                                   |
| AB2019 | <i>atpB</i> | ATP synthase F0 sector, A subunit                                     |
| AB2023 |             | Conserved hypothetical membrane protein (DUF205 domain protein)       |
| AB2024 | <i>nadA</i> | Quinolinate synthetase A protein                                      |
| AB2025 | <i>nadC</i> | Nicotinate-nucleotide pyrophosphorylase                               |
| AB2026 |             | Exopolyphosphatase-related protein                                    |
| AB2027 |             | Peptidase, M23/M37 family                                             |
| AB2028 | <i>lpxC</i> | UDP-3-O-acyl-N-acetylglucosamine deacetylase                          |
| AB2029 |             | Conserved hypothetical protein                                        |
| AB2030 | <i>thrB</i> | Homoserine kinase                                                     |
| AB2031 |             | Hypothetical protein (DUF448 domain protein)                          |
| AB2032 | <i>infB</i> | Translation initiation factor IF-2                                    |
| AB2033 | <i>rbfA</i> | Ribosome binding factor A                                             |
| AB2034 |             | Conserved hypothetical protein (DUF150 domain protein)                |
| AB2035 | <i>ribD</i> | Riboflavin biosynthesis protein RibD                                  |
| AB2036 | <i>efp</i>  | Translation elongation factor EF-P                                    |
| AB2037 | <i>serA</i> | D-3-phosphoglycerate dehydrogenase                                    |
| AB2038 | <i>rpsA</i> | 30S ribosomal protein S1                                              |
| AB2039 | <i>ispH</i> | 4-hydroxy-3-methylbut-2-enyl diphosphate reductase                    |
| AB2040 | <i>aroA</i> | 3-phosphoshikimate 1-carboxyvinyltransferase                          |
| AB2041 | <i>pheT</i> | Phenylalanyl-tRNA synthetase, beta subunit                            |
| AB2042 | <i>pheS</i> | Phenylalanyl-tRNA synthetase, alpha subunit                           |
| AB2043 |             | HIT family protein                                                    |
| AB2044 | <i>accA</i> | Acetyl-CoA carboxylase, carboxyltransferase, alpha subunit            |
| AB2045 | <i>fabF</i> | Beta ketoacyl-(acyl carrier protein) synthase II                      |
| AB2046 | <i>acpP</i> | Acyl carrier protein, putative                                        |
| AB2047 | <i>fabG</i> | 3-oxoacyl-(acyl carrier protein) reductase                            |
| AB2048 |             | Radical SAM domain protein                                            |
| AB2049 |             | Conserved hypothetical protein                                        |
| AB2050 | <i>exsB</i> | Transcriptional regulator, ExsB family                                |
| AB2051 |             | Conserved hypothetical protein                                        |
| AB2052 |             | Conserved hypothetical protein (DUF558 domain protein)                |
| AB2053 | <i>petC</i> | Ubiquinol cytochrome c oxidoreductase, cytochrome c1 subunit          |
| AB2054 | <i>petB</i> | Ubiquinol cytochrome c oxidoreductase, cytochrome b subunit           |
| AB2055 | <i>petA</i> | Ubiquinol cytochrome c oxidoreductase, 2Fe-2S subunit                 |
| AB2056 | <i>thrC</i> | Threonine synthase                                                    |
| AB2057 | <i>argB</i> | Acetylglutamate kinase                                                |
| AB2058 |             | ATP-dependent DNA helicase, UvrD/REP family                           |
| AB2059 |             | Hypothetical protein                                                  |
| AB2060 | <i>prfB</i> | Peptide chain release factor 2                                        |
| AB2061 |             | Conserved hypothetical protein                                        |

|        |              |                                                            |
|--------|--------------|------------------------------------------------------------|
| AB2062 |              | Conserved hypothetical protein                             |
| AB2063 |              | Hypothetical protein                                       |
| AB2064 |              | Conserved hypothetical protein                             |
| AB2066 |              | Hypothetical protein                                       |
| AB2067 | <i>ccoP</i>  | Cytochrome c oxidase, cbb3-type, subunit III               |
| AB2068 | <i>ccoQ</i>  | Cytochrome c oxidase, cbb3-type, subunit IV                |
| AB2069 | <i>ccoO</i>  | Cytochrome c oxidase, cbb3-type, subunit II                |
| AB2070 | <i>ccoN</i>  | Cytochrome c oxidase, cbb3-type, subunit I                 |
| AB2071 | <i>smpB</i>  | tmRNA-binding protein SmpB                                 |
| AB2072 | <i>ispE</i>  | 4-diphosphocytidyl-2C-methyl-D-erythritol kinase           |
| AB2073 | <i>truB</i>  | tRNA pseudouridine synthase B                              |
| AB2074 |              | ATP-dependent DNA helicase, UvrD/PcrA family               |
| AB2075 |              | Transcriptional regulator, LysR family                     |
| AB2076 |              | Conserved hypothetical protein, radical SAM domain protein |
| AB2077 | <i>purF</i>  | Amidophosphoribosyltransferase                             |
| AB2078 | <i>dapB</i>  | Dihydrodipicolinate reductase                              |
| AB2079 | <i>trxB</i>  | Thioredoxin reductase                                      |
| AB2080 | <i>trxA2</i> | Thioredoxin                                                |
| AB2081 | <i>alaS</i>  | Alanyl-tRNA synthetase                                     |
| AB2082 |              | Conserved hypothetical protein (DUF541 domain protein)     |
| AB2083 |              | Major facilitator superfamily transporter                  |
| AB2085 |              | Conserved hypothetical protein                             |
| AB2086 |              | Two-component sensor histidine kinase                      |
| AB2087 |              | Two-component response regulator                           |
| AB2088 | <i>htrA</i>  | Periplasmic serine protease DO; heat shock protein HtrA    |
| AB2089 | <i>ilvD</i>  | Dihydroxyacid dehydratase                                  |
| AB2098 |              | Hypothetical protein                                       |
| AB2099 |              | Conserved hypothetical protein                             |
| AB2100 |              | ABC transporter, ATP-binding protein                       |
| AB2103 | <i>dksA</i>  | DnaK suppressor protein DksA                               |
| AB2104 |              | tRNA pseudouridine synthase                                |
| AB2105 |              | Conserved hypothetical protein                             |
| AB2106 |              | Conserved hypothetical protein                             |
| AB2107 | <i>ctpA</i>  | Carboxyl-terminal protease family protein                  |
| AB2108 | <i>purC</i>  | Phosphoribosylaminoimidazole-succinocarboxamide synthase   |
| AB2109 | <i>purS</i>  | Phosphoribosylformylglycinamide synthetase                 |
| AB2110 | <i>purQ</i>  | Phosphoribosylformylglycinamide synthase I                 |
| AB2111 |              | Conserved hypothetical protein                             |
| AB2112 | <i>plsC</i>  | 1-acyl-sn-glycerol-3-phosphate acyltransferase PlsC        |
| AB2113 | <i>crcB</i>  | Camphor resistance CrcB protein                            |
| AB2114 |              | Twin-arginine translocation protein, TatA/E family         |
| AB2115 |              | Twin-arginine translocation protein, TatA/E family         |
| AB2116 | <i>argS</i>  | Arginyl-tRNA synthetase                                    |
| AB2117 |              | Conserved hypothetical protein (DUF143 domain protein)     |
| AB2118 | <i>nadD</i>  | Nicotinate (nicotinamide) nucleotide adenyltransferase     |
| AB2119 | <i>gapA</i>  | Glyceraldehyde 3-phosphate dehydrogenase A                 |
| AB2120 | <i>pgk</i>   | Phosphoglycerate kinase                                    |
| AB2121 | <i>tpiA</i>  | Triosephosphate isomerase                                  |
| AB2122 | <i>fabI</i>  | Enoyl-(acyl carrier protein) reductase                     |
| AB2123 | <i>lysA</i>  | Diaminopimelate decarboxylase                              |
| AB2124 | <i>pheA</i>  | Chorismate mutase\prephenate dehydratase                   |
| AB2125 | <i>hisC</i>  | Histidinol-phosphate aminotransferase                      |
| AB2126 | <i>dxs</i>   | 1-deoxy-D-xylulose-5-phosphate synthase                    |
| AB2127 |              | Cytochrome c551 peroxidase                                 |
| AB2128 |              | Septum formation protein Maf homolog                       |

|        |              |                                                              |
|--------|--------------|--------------------------------------------------------------|
| AB2129 | <i>panE</i>  | Ketopantoate reductase                                       |
| AB2130 |              | Conserved hypothetical protein                               |
| AB2131 |              | Probable lipoprotein nlpC homolog precursor                  |
| AB2132 |              | Putative transcriptional regulator, Crp/Fnr family           |
| AB2133 |              | Conserved hypothetical protein                               |
| AB2134 | <i>ung</i>   | Uracil-DNA glycosylase                                       |
| AB2135 |              | Aldehyde dehydrogenase family protein                        |
| AB2136 | <i>ilvB</i>  | Acetolactate synthase                                        |
| AB2137 | <i>lemA</i>  | LemA protein                                                 |
| AB2138 |              | Conserved hypothetical protein                               |
| AB2139 |              | Conserved hypothetical membrane protein (DUF477)             |
| AB2140 | <i>gph</i>   | Phosphoglycolate phosphatase                                 |
| AB2141 |              | DNA-binding ferritin-like protein (Dps/NapA)                 |
| AB2144 |              | Major facilitator superfamily transporter                    |
| AB2145 |              | Hypothetical protein                                         |
| AB2146 |              | GGDEF/HAMP domain protein                                    |
| AB2147 |              | Multidrug efflux protein, HlyD family                        |
| AB2148 |              | Multidrug efflux protein, AcrB/AcrD/AcrF family              |
| AB2149 |              | RND efflux system, outer membrane lipoprotein                |
| AB2151 |              | Sigma factor regulatory protein, FecR/PupR family            |
| AB2152 |              | Sigma factor, ECF family                                     |
| AB2155 |              | Conserved hypothetical protein                               |
| AB2156 | <i>metY</i>  | O-acetylhomoserine sulfhydrylase                             |
| AB2157 | <i>iscR</i>  | Transcriptional regulator, BadM/Rrf2 family                  |
| AB2158 | <i>cysK1</i> | Cysteine synthase                                            |
| AB2159 |              | Conserved hypothetical protein                               |
| AB2160 | <i>cysH</i>  | Adenosine phosphosulfate (APS) reductase                     |
| AB2161 | <i>cysD</i>  | ATP sulfurylase, small subunit                               |
| AB2162 | <i>cysN</i>  | ATP sulfurylase, large subunit                               |
| AB2163 | <i>cysI</i>  | Sulfite reductase, iron-sulfur subunit                       |
| AB2164 |              | Hypothetical protein                                         |
| AB2165 |              | Aminotransferase, NifS-like protein                          |
| AB2167 |              | Hypothetical protein                                         |
| AB2168 | <i>cobS</i>  | Cobalamin (Vitamin B12) synthase                             |
| AB2169 | <i>cobP</i>  | Cobinamide kinase / Cobinamide phosphate guanylyltransferase |
| AB2170 |              | Lipolytic enzyme, GDSL domain                                |
| AB2171 |              | Conserved hypothetical protein                               |
| AB2172 |              | Sodium:sulfate symporter family protein                      |
| AB2173 |              | Conserved hypothetical protein (DUF81 domain protein)        |
| AB2174 | <i>dsbD</i>  | Thiol:disulfide interchange protein DsbD                     |
| AB2175 | <i>rimK</i>  | Ribosomal protein S6 modification protein                    |
| AB2176 |              | Conserved hypothetical protein (DUF785 domain protein)       |
| AB2177 |              | Conserved hypothetical protein                               |
| AB2178 |              | EAL/GGDEF domain protein                                     |
| AB2179 | <i>psd</i>   | Phosphatidylserine decarboxylase                             |
| AB2180 |              | Hypothetical protein                                         |
| AB2181 | <i>mltA</i>  | Peptidoglycan N-acetylmuramoylhydrolase                      |
| AB2182 | <i>dnaK</i>  | DnaK-type molecular chaperone                                |
| AB2183 | <i>grpE</i>  | Heat shock protein GrpE                                      |
| AB2184 | <i>hrcA</i>  | Putative heat shock regulator                                |
| AB2185 |              | Conserved hypothetical protein                               |
| AB2186 | <i>truA</i>  | tRNA pseudouridine synthase A                                |
| AB2191 | <i>glmU</i>  | UDP-N-acetylglucosamine pyrophosphorylase                    |
| AB2192 |              | Ankyrin repeat protein                                       |
| AB2193 |              | Probable ATP-dependent RNA helicase                          |

|        |             |                                                                             |
|--------|-------------|-----------------------------------------------------------------------------|
| AB2194 | <i>trmA</i> | tRNA (uracil-5-)-methyltransferase                                          |
| AB2195 |             | Hypothetical protein                                                        |
| AB2199 | <i>gidA</i> | Glucose inhibited division protein A                                        |
| AB2200 | <i>ribE</i> | Riboflavin synthase, alpha subunit                                          |
| AB2201 | <i>mreC</i> | Rod shape-determining protein MreC                                          |
| AB2202 | <i>mreB</i> | Rod shape-determining protein MreB                                          |
| AB2203 | <i>clpX</i> | ATP-dependent Clp protease, ATP-binding subunit ClpX                        |
| AB2204 | <i>lpxA</i> | UDP-N-acetylglucosamine acyltransferase                                     |
| AB2205 | <i>fabZ</i> | 3-hydroxymyristoyl-(acyl carrier protein) dehydratase                       |
| AB2206 | <i>lpxB</i> | Lipid A disaccharide synthase                                               |
| AB2207 |             | Conserved hypothetical protein (DUF208 domain protein)                      |
| AB2208 |             | Hypothetical protein                                                        |
| AB2209 | <i>ndh</i>  | NADH dehydrogenase                                                          |
| AB2212 |             | Multidrug efflux protein, Acr family                                        |
| AB2213 |             | Multidrug efflux protein, HlyD family                                       |
| AB2214 |             | Transcriptional regulator, TetR family                                      |
| AB2215 |             | Major facilitator superfamily transporter, Bcr/CflA subfamily               |
| AB2216 |             | Sulfate permease family protein                                             |
| AB2217 |             | Hypothetical protein                                                        |
| AB2218 |             | Hypothetical protein                                                        |
| AB2219 |             | Hypothetical protein                                                        |
| AB2223 | <i>murB</i> | UDP-N-acetylenolpyruvoylglucosamine reductase                               |
| AB2224 | <i>topA</i> | DNA topoisomerase I                                                         |
| AB2225 |             | Conserved hypothetical protein                                              |
| AB2226 | <i>bioB</i> | Biotin synthetase                                                           |
| AB2227 |             | Conserved hypothetical protein                                              |
| AB2228 |             | Hypothetical protein                                                        |
| AB2229 | <i>eno</i>  | Enolase                                                                     |
| AB2230 | <i>recA</i> | DNA-dependent ATPase, RecA                                                  |
| AB2231 |             | Hypothetical protein                                                        |
| AB2232 | <i>pseB</i> | UDP GlcNAc dehydratase/reductase PseB, putative                             |
| AB2233 |             | DegT/DnrJ/EryC1/StrS aminotransferase                                       |
| AB2234 | <i>neuA</i> | Acyneuraminate cytidyltransferase                                           |
| AB2245 |             | 4Fe-4S ferredoxin, iron-sulfur binding                                      |
| AB2246 | <i>pyrG</i> | CTP synthetase                                                              |
| AB2247 | <i>recJ</i> | Single-stranded DNA-specific exonuclease                                    |
| AB2248 |             | Hypothetical protein                                                        |
| AB2249 |             | Conserved hypothetical protein                                              |
| AB2250 | <i>thiJ</i> | 4-methyl-5(beta-hydroxyethyl)-thiazole monophosphate synthesis protein ThiJ |
| AB2251 | <i>dnaE</i> | DNA polymerase III, alpha subunit                                           |
| AB2252 | <i>surE</i> | Stationary-phase survival protein SurE                                      |
| AB2253 |             | Hypothetical protein                                                        |
| AB2254 |             | Conserved hypothetical protein                                              |
| AB2255 | <i>moaC</i> | Molybdenum cofactor biosynthesis protein C                                  |
| AB2256 | <i>rpsU</i> | 30S ribosomal protein S21                                                   |
| AB2257 |             | Conserved hypothetical integral membrane protein                            |
| AB2258 |             | Conserved hypothetical protein                                              |
| AB2259 |             | Conserved hypothetical protein, putative methyltransferase                  |
| AB2260 | <i>secG</i> | Protein-export membrane protein SecG                                        |
| AB2261 | <i>frf</i>  | Ribosome releasing factor                                                   |
| AB2262 | <i>pyrE</i> | Orotate phosphoribosyltransferase                                           |
| AB2263 |             | Conserved hypothetical protein, RDD family                                  |
| AB2264 |             | Putative major facilitator superfamily transporter                          |
| AB2265 |             | CorA-like Mg <sup>2+</sup> transporter protein                              |
| AB2266 |             | Conserved hypothetical protein (DUF328 domain protein)                      |

|        |              |                                                                            |
|--------|--------------|----------------------------------------------------------------------------|
| AB2270 |              | Metallophosphoesterase                                                     |
| AB2275 |              | Conserved hypothetical protein                                             |
| AB2276 |              | Methyl-accepting chemotaxis protein                                        |
| AB2277 | <i>moeB</i>  | Molybdopterin biosynthesis protein                                         |
| AB2281 | <i>cysA</i>  | Sulfate ABC transporter (ATP-binding protein)                              |
| AB2282 | <i>cysW</i>  | Sulfate transport system permease protein                                  |
| AB2283 | <i>cysT</i>  | Sulfate transport system permease protein                                  |
| AB2284 | <i>cysK2</i> | Cysteine synthase                                                          |
| AB2285 |              | EAL domain protein                                                         |
| AB2286 |              | Conserved hypothetical protein                                             |
| AB2287 | <i>sbp</i>   | Sulfate-binding protein precursor                                          |
| AB2288 |              | Transcriptional regulator, BadM/Rrf2 family                                |
| AB2293 | <i>typA</i>  | GTP-binding elongation factor family protein                               |
| AB2294 |              | Conserved hypothetical protein, putative transport system permease protein |
| AB2295 |              | Conserved hypothetical protein, SirA-like protein                          |
| AB2302 |              | GGDEF/PAS domain protein                                                   |
| AB2303 |              | Sulfatase                                                                  |
| AB2305 |              | Cytochrome c-type protein, putative                                        |
| AB2306 |              | Diheme cytochrome c precursor, putative                                    |
| AB2307 |              | Cytochrome b, putative                                                     |
| AB2308 |              | Hypothetical protein                                                       |
| AB2310 |              | Two-component response regulator                                           |
| AB2311 |              | Two-component sensor histidine kinase                                      |
| AB2312 |              | Methyltransferase                                                          |
| AB2313 |              | Transcriptional regulator, AraC family                                     |
| AB2314 |              | HD_GYP domain response regulator                                           |
| AB2315 | <i>thyX</i>  | Thymidylate synthase ThyX                                                  |
| AB2317 |              | Conserved hypothetical membrane protein                                    |
| AB2319 | <i>purN</i>  | Phosphoribosylglycinamide formyltransferase                                |
| AB2320 | <i>ruvC</i>  | Crossover junction endodeoxyribonuclease RuvC                              |
