# Supplementary material for: The Complete Genome Sequence and Analysis of the Epsilonproteobacterium Arcobacter butzleri
Source: PLOS journal article supplement (doi:10.1371/journal.pone.0001358), 2007-12-26
Supplement: S9 (10.1371/journal.pone.0001358.s009) [file journal.pone.0001358.s009]

**Table S7. CDS present only in *A. butzleri* strain RM4018**

| <b><u>Gene</u></b> | <b><u>Common</u></b> | <b><u>Description</u></b>                                                     |
|--------------------|----------------------|-------------------------------------------------------------------------------|
| AB0104             |                      | Conserved hypothetical protein, putative tricarboxylic transport protein TctA |
| AB0198             | <i>flgI</i>          | Flagellar P-ring protein FlgI                                                 |
| AB0563             | <i>soxC</i>          | Sulfur oxidation protein SoxCD, sulfur dehydrogenase subunit                  |
| AB0564             | <i>soxD</i>          | Sulfur oxidation protein SoxCD, diheme cytochrome c subunit                   |
| AB0565             | <i>soxX</i>          | Sulfur oxidation protein SoxXA, monoheme cytochrome c subunit                 |
| AB0566             | <i>soxY</i>          | Sulfur oxidation protein SoxYZ, sulfur covalently binding protein             |
| AB0567             | <i>soxZ</i>          | Sulfur oxidation protein SoxYZ, sulfur compound chelating protein             |
| AB0568             | <i>soxA</i>          | Sulfur oxidation protein SoxXA, diheme cytochrome c subunit                   |
| AB0569             |                      | Hypothetical protein                                                          |
| AB0570             | <i>soxB</i>          | Sulfur oxidation protein, sulfate thiol esterase                              |
| AB0571             |                      | Hypothetical protein                                                          |
| AB0576             | <i>pfpl</i>          | Peptidase, ThiJ/Pfpl family protein                                           |
| AB0578             |                      | Conserved hypothetical protein, beta-lactamase-like protein                   |
| AB0941             |                      | Adhesin/haemagglutinin, HecA family                                           |
| AB0942             |                      | Hypothetical protein                                                          |
| AB0944             |                      | Hypothetical protein                                                          |
| AB0945             |                      | Hypothetical protein                                                          |
| AB0946             |                      | Hypothetical protein                                                          |
| AB1214             |                      | Conserved hypothetical protein                                                |
| AB1292             |                      | Sulfate permease                                                              |
| AB1332             |                      | Hypothetical protein                                                          |
| AB1335             |                      | Conserved hypothetical protein                                                |
| AB1337             |                      | DEAD/DEAH box helicase domain protein                                         |
| AB1338             |                      | Hypothetical protein                                                          |
| AB1340             |                      | Hypothetical protein                                                          |
| AB1342             |                      | Hypothetical protein                                                          |
| AB1344             |                      | Hypothetical protein                                                          |
| AB1345             |                      | Hypothetical protein                                                          |
| AB1346             |                      | Hypothetical protein                                                          |
| AB1347             |                      | Hypothetical protein                                                          |
| AB1348             |                      | Hypothetical protein                                                          |
| AB1349             |                      | Conserved hypothetical protein                                                |
| AB1350             |                      | Hypothetical protein                                                          |
| AB1352             |                      | Hypothetical protein                                                          |
| AB1357             |                      | Hypothetical protein                                                          |
| AB1665             |                      | Phage major tail tube protein                                                 |
| AB1688             |                      | Hypothetical protein                                                          |
| AB1724             |                      | Conserved hypothetical protein                                                |
| AB1729             |                      | Hypothetical protein                                                          |
| AB1730             | <i>hsdS</i>          | Type I restriction-modification system specificity determinant                |
| AB1731             | <i>hsdM</i>          | Type I restriction-modification system, M subunit, putative                   |
| AB2272             |                      | TonB-dependent receptor protein                                               |
